# Supplementary material
Source: publisher site journal article supplement (https://www.dovepress.com/article/480491)
Supplement: Supplementary file 1 [file get_supplementary_file.php]

**1 Supplementary Figures**


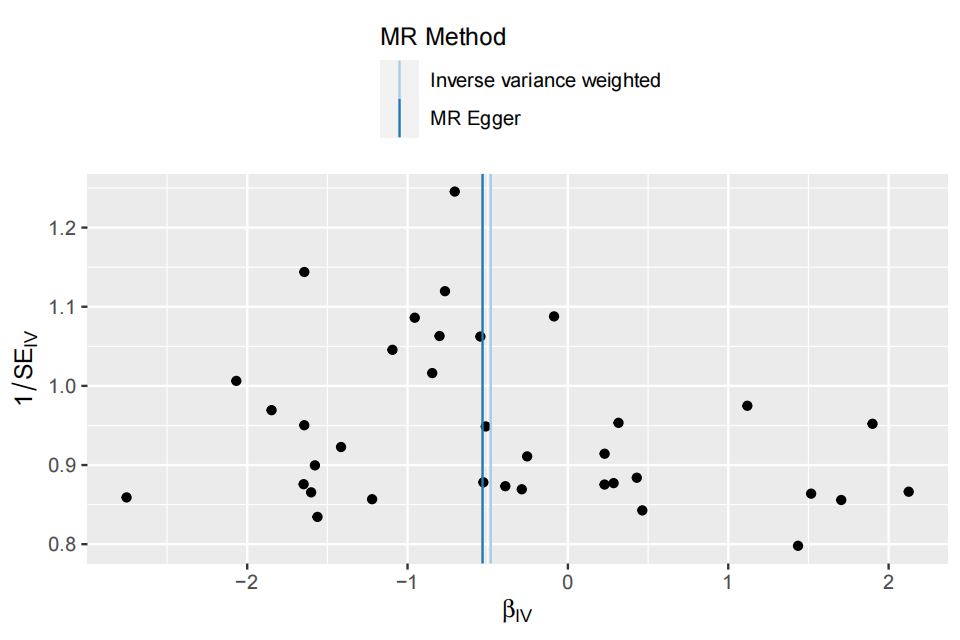


**Figure S1** Funnel plot for genetically predicted sleep duration on low grip strength.


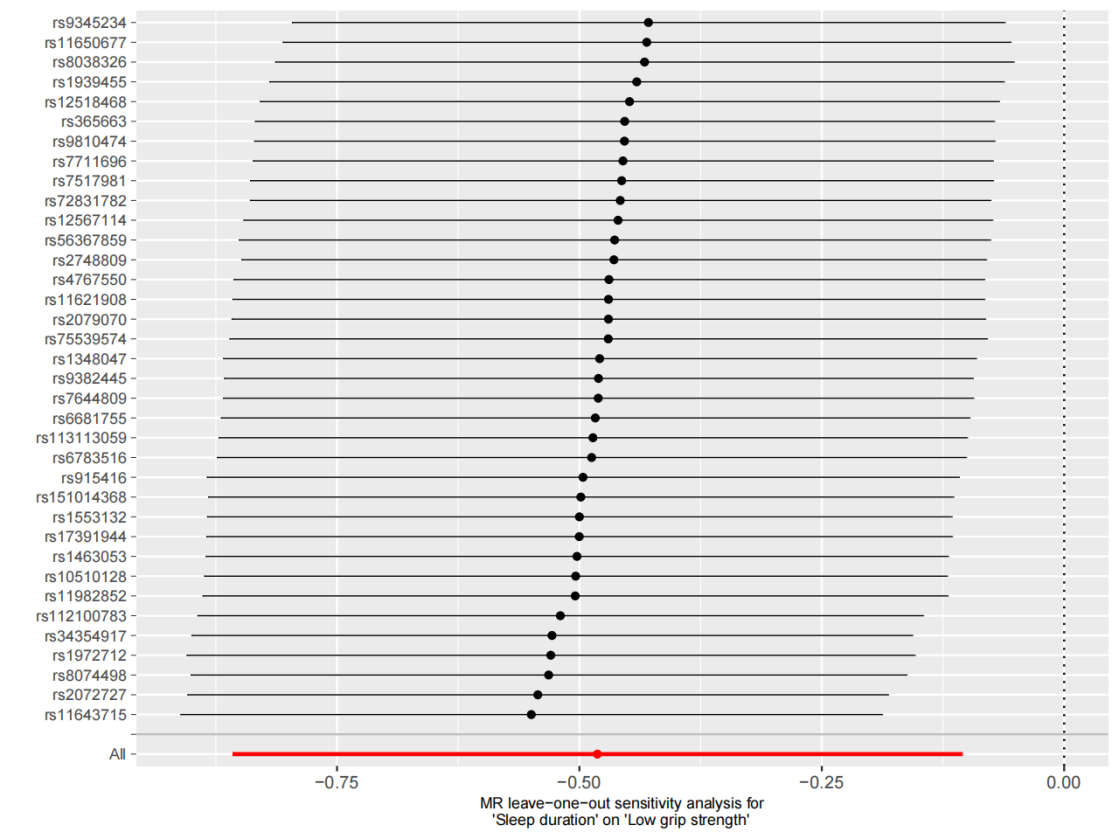


**Figure S2** Leave-one-out analysis for genetically predicted sleep duration on low grip strength.


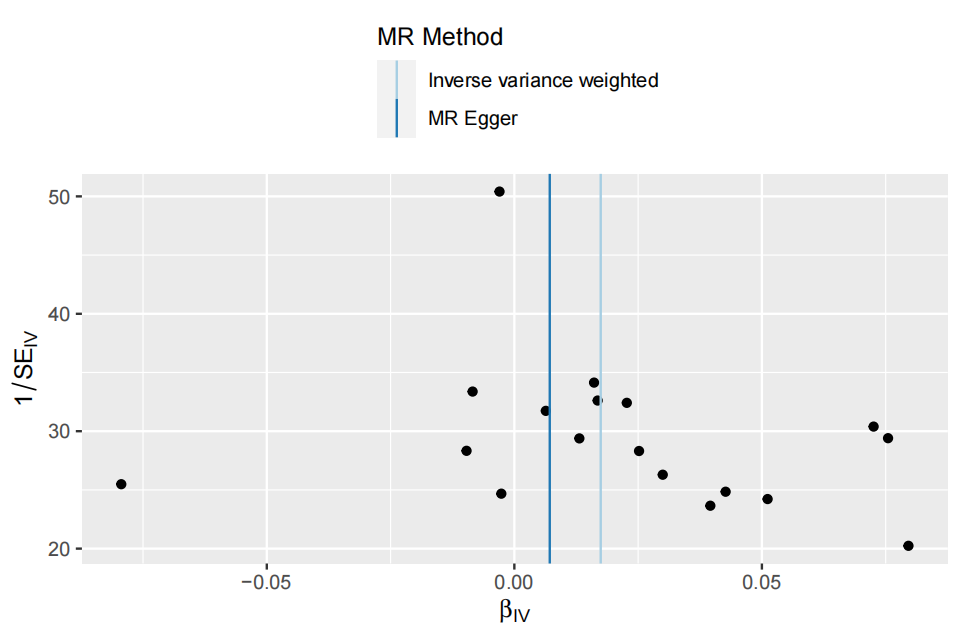


**Figure S3** Funnel plot for genetically predicted sleep-wake disorders on low grip strength.


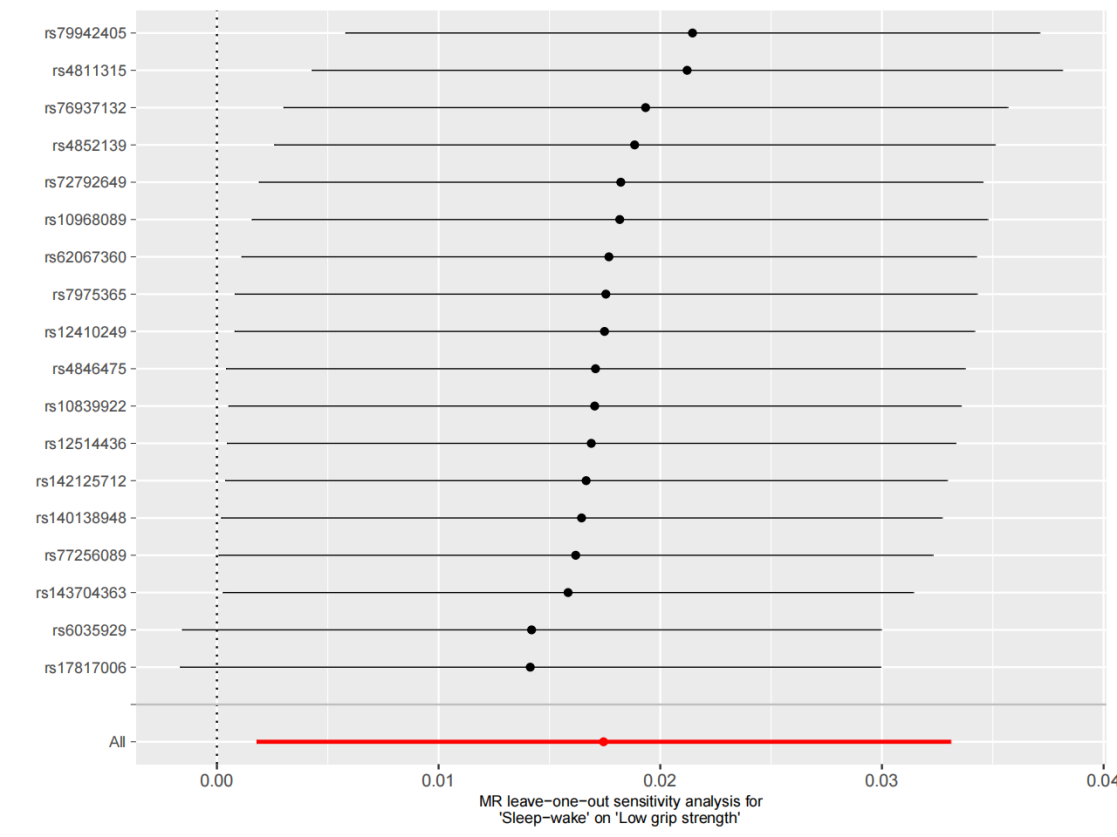


**Figure S4** Leave-one-out analysis for genetically predicted sleep-wake disorders on low grip strength.


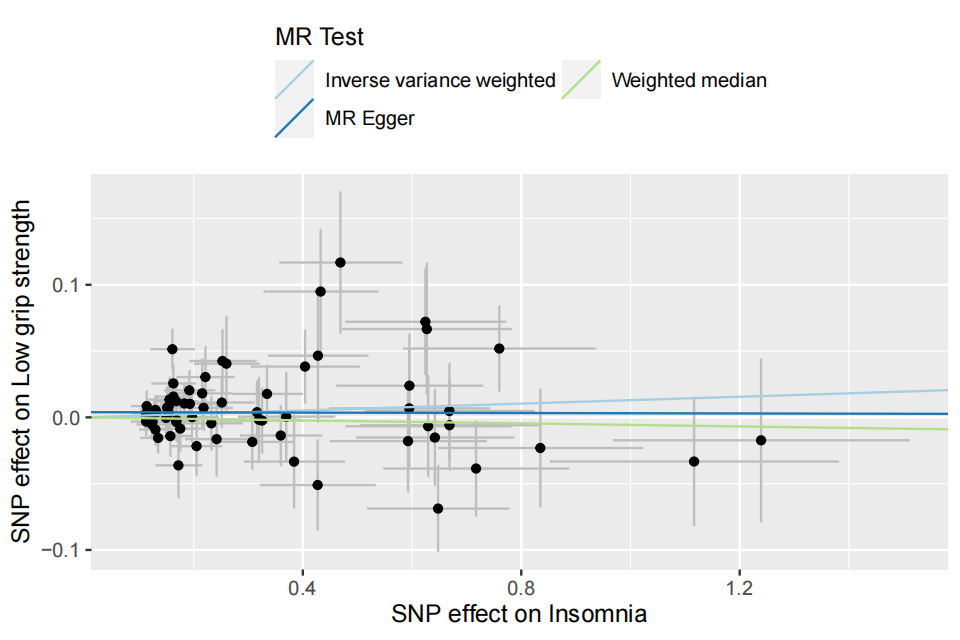


**Figure S5** Scatterplot for genetically predicted insomnia on low grip strength.


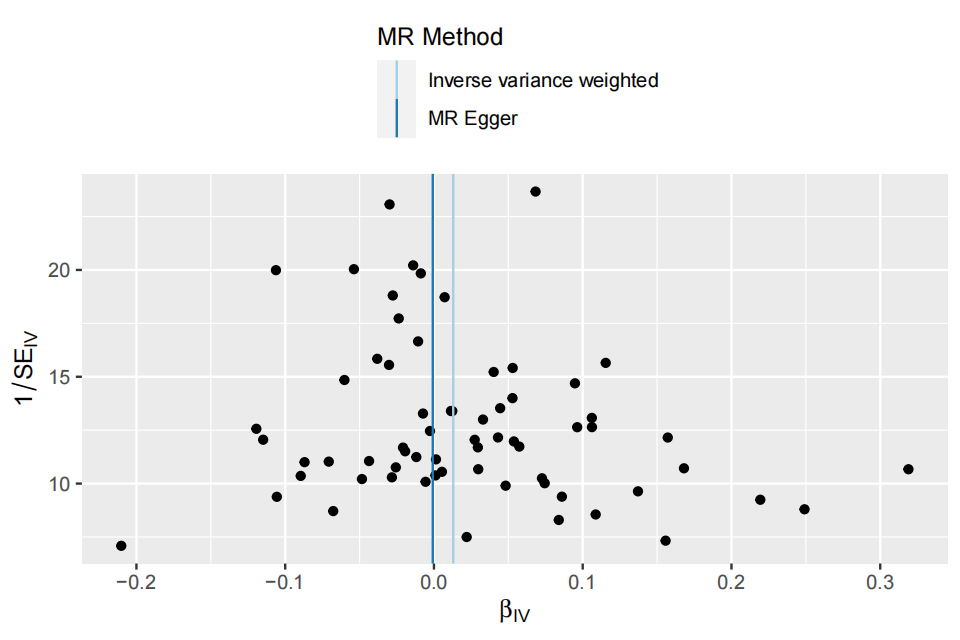


**Figure S6** Funnel plot for genetically predicted insomnia on low grip strength.


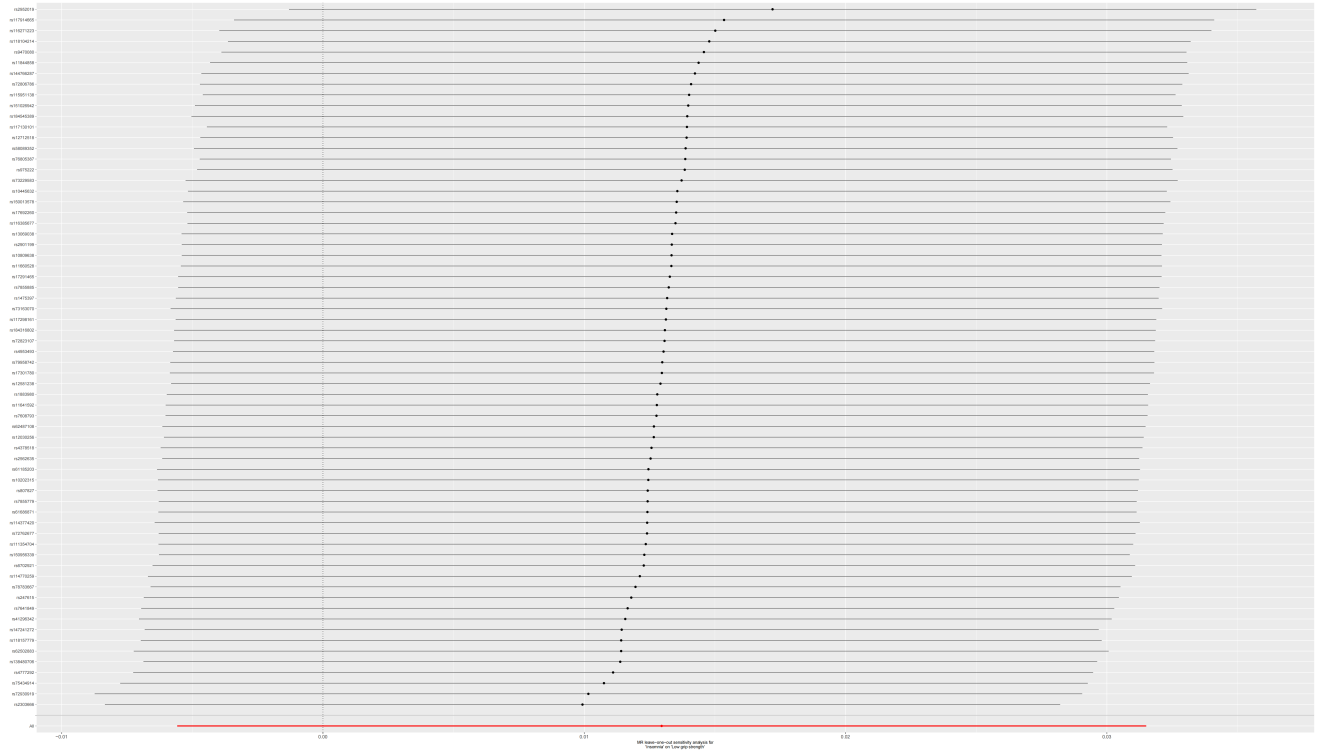


**Figure S7** Leave-one-out analysis for genetically predicted insomnia on low grip strength.


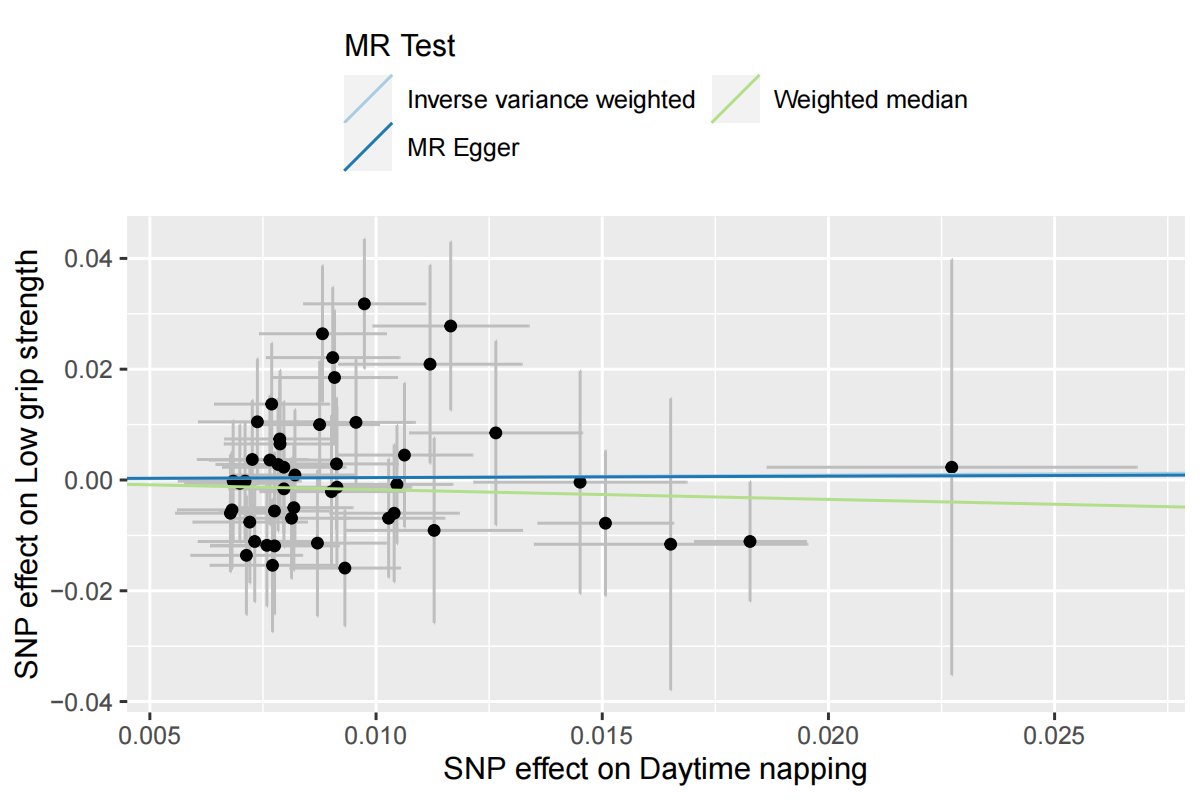


**Figure S8** Scatterplot for genetically predicted daytime napping on low grip strength.


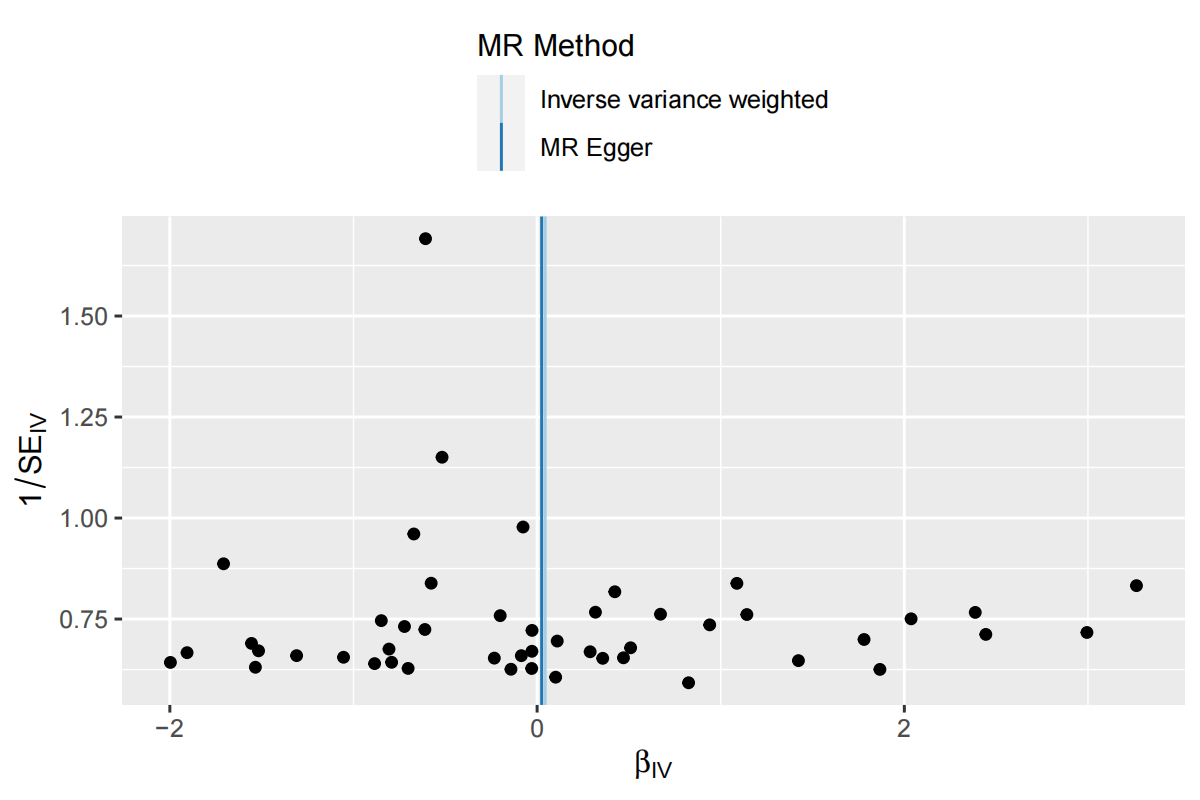


**Figure S9** Funnel plot for genetically predicted daytime napping on low grip strength.


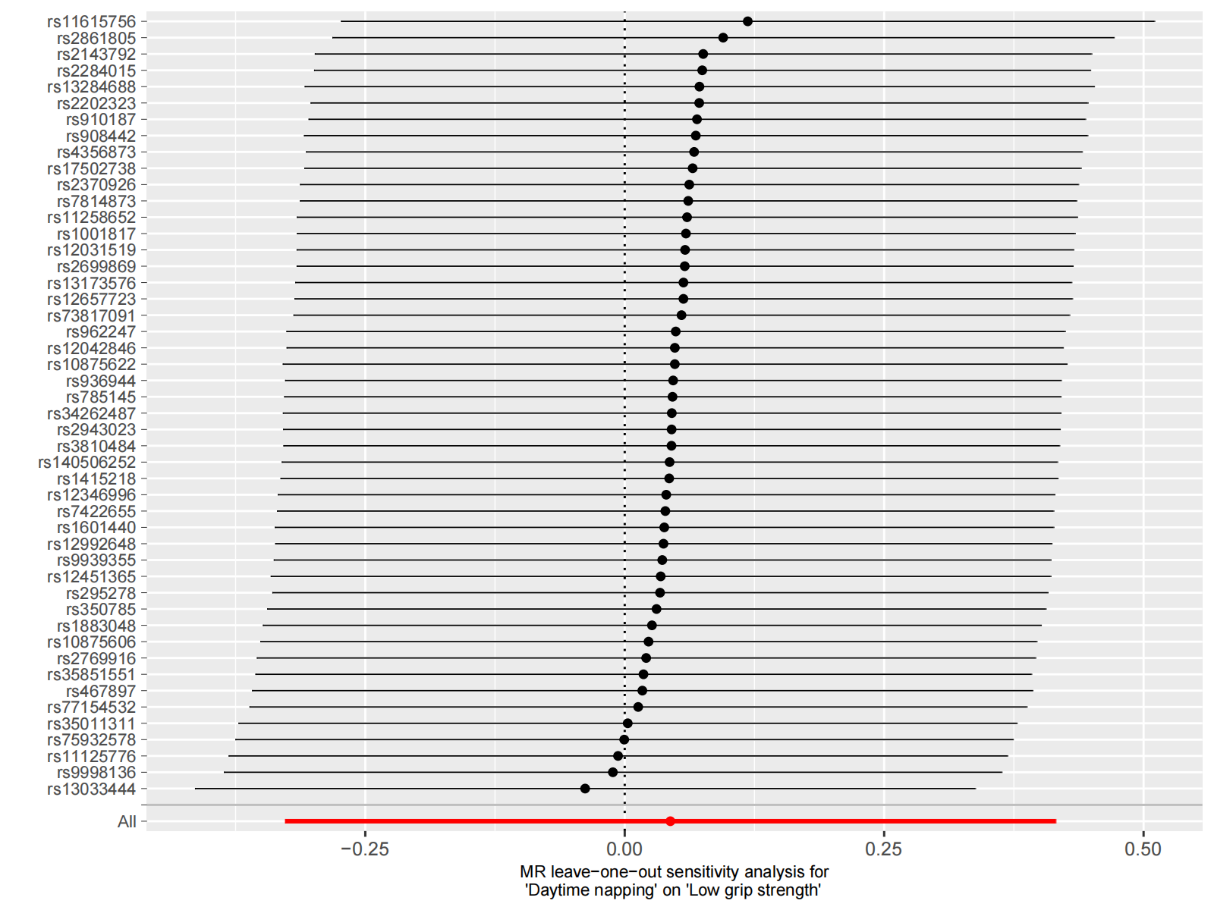


**Figure S10** Leave-one-out analysis for genetically predicted daytime napping on low grip strength.


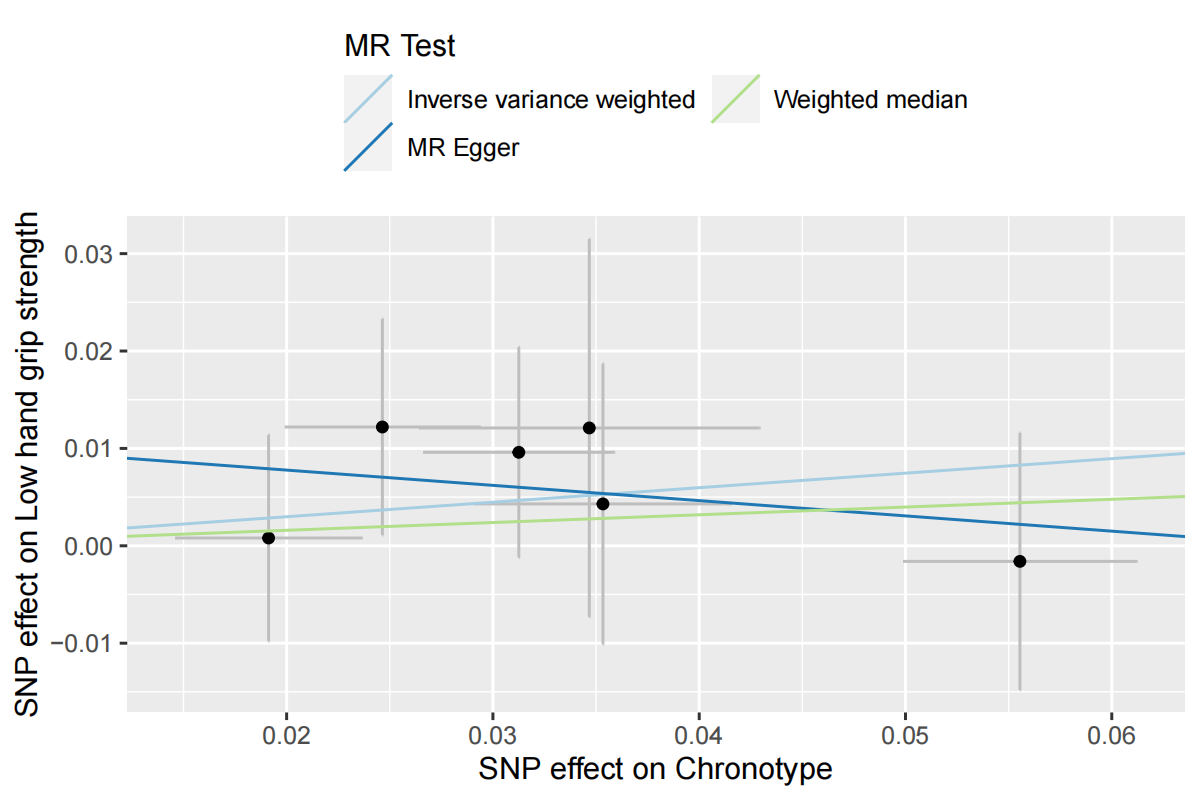


**Figure S11** Scatterplot for genetically predicted chronotype on low grip strength.


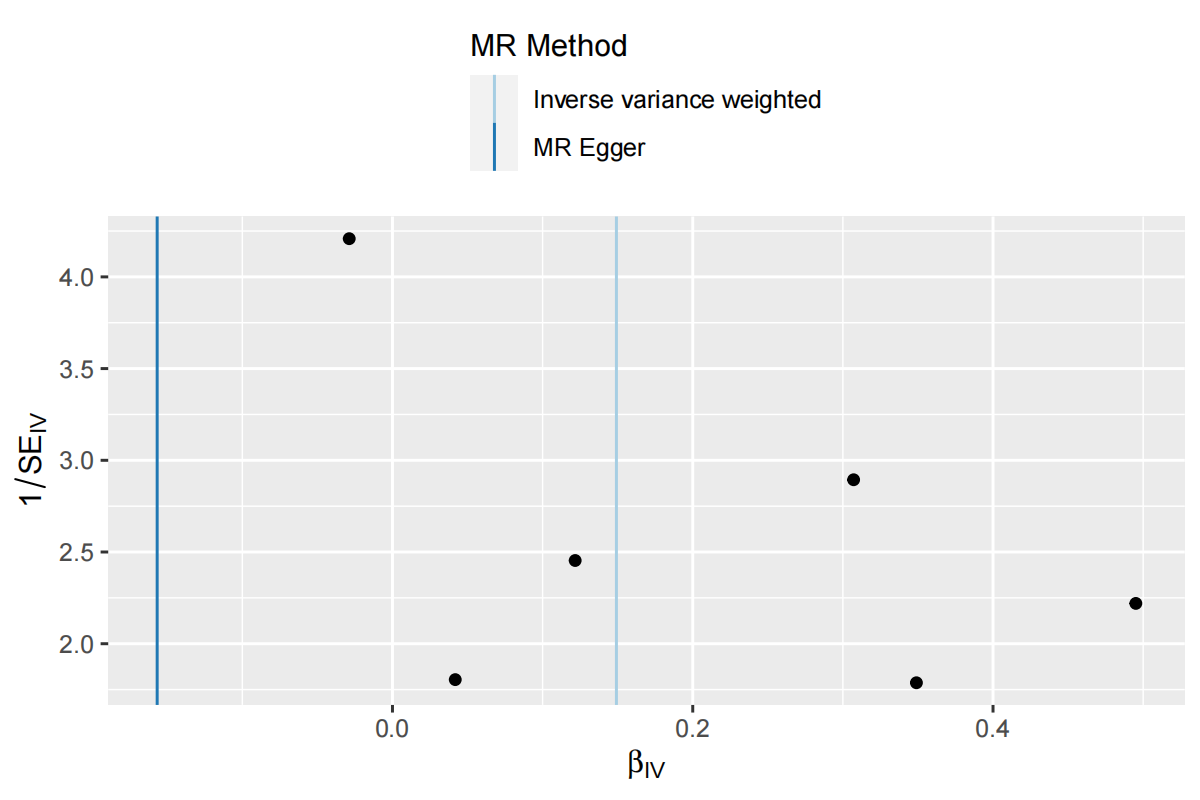


**Figure S12** Funnel plot for genetically predicted chronotype on low grip strength.


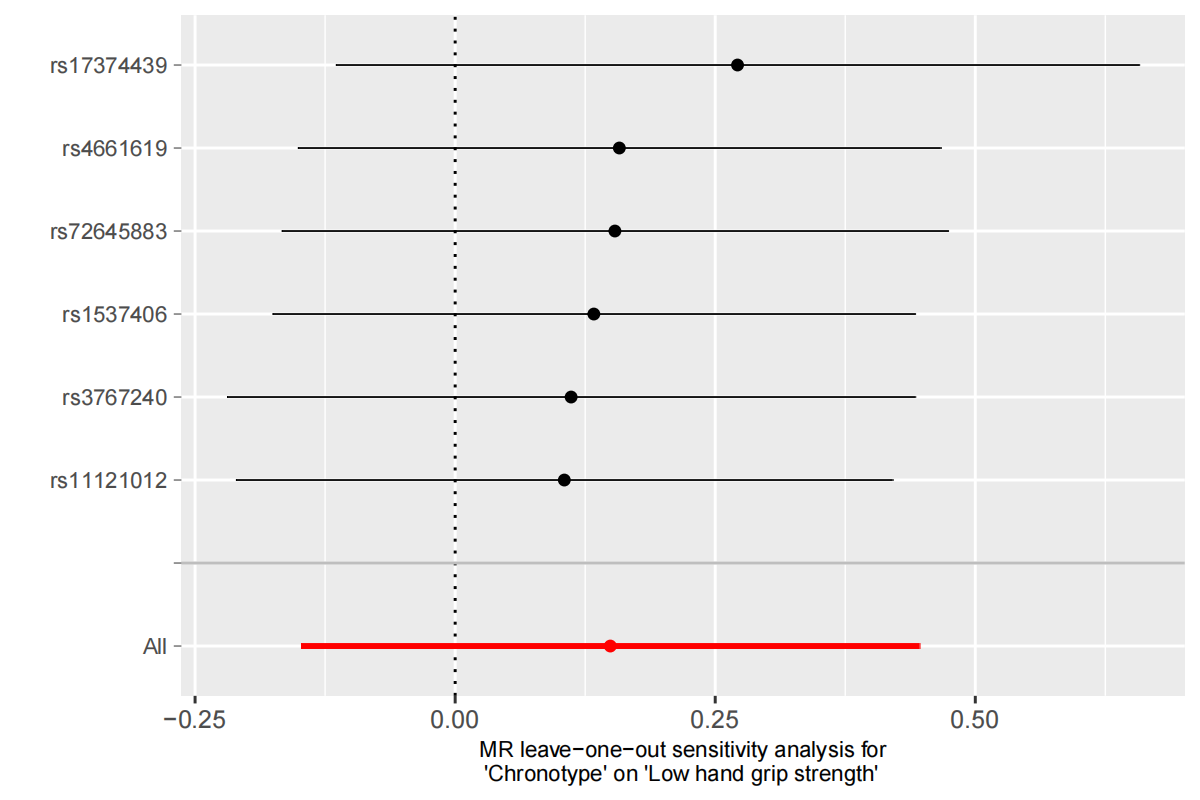


**Figure S13** Leave-one-out analysis for genetically predicted chronotype on low grip strength.


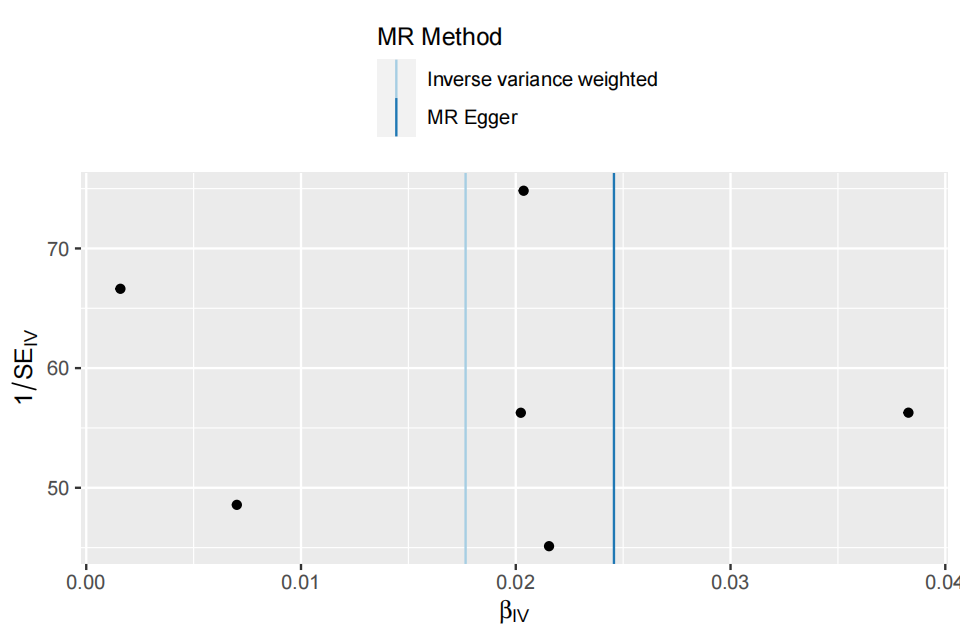


**Figure S14** Funnel plot for genetically predicted low grip strength on daytime napping.


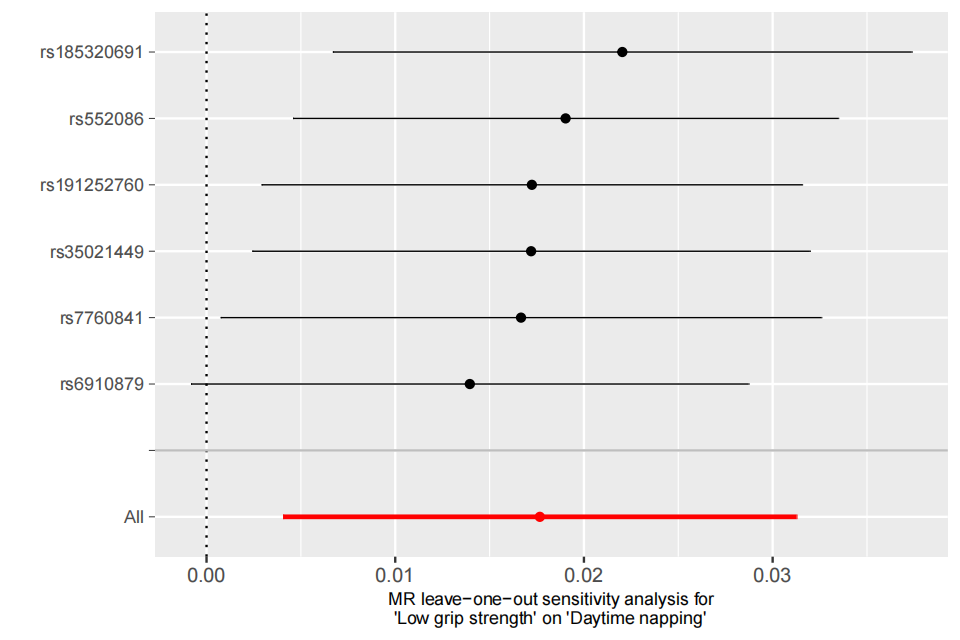


**Figure S15** Leave-one-out analysis for genetically predicted low grip strength on daytime napping.


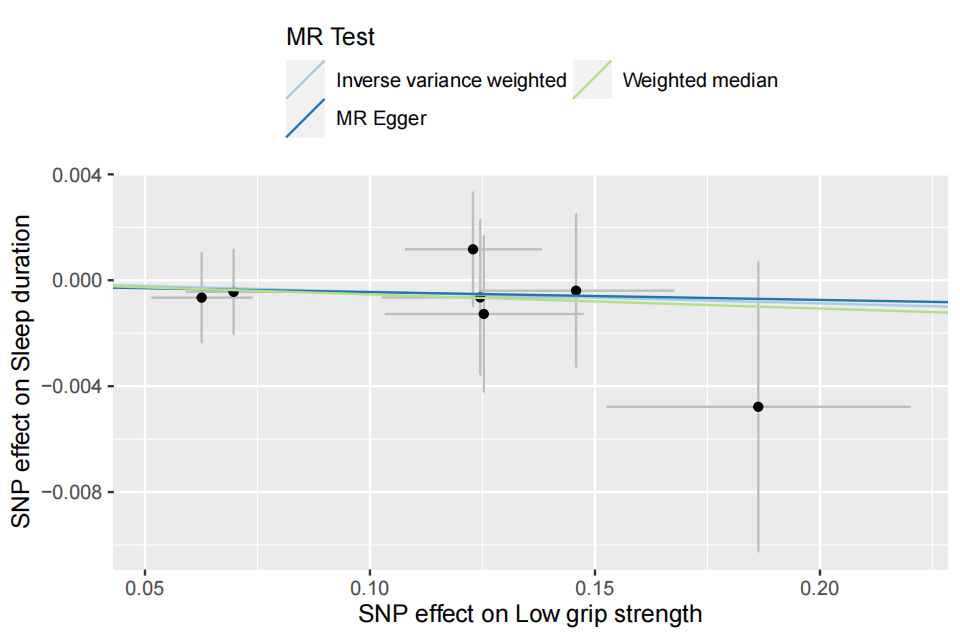


**Figure S16** Scatterplot for genetically predicted low grip strength on sleep duration.


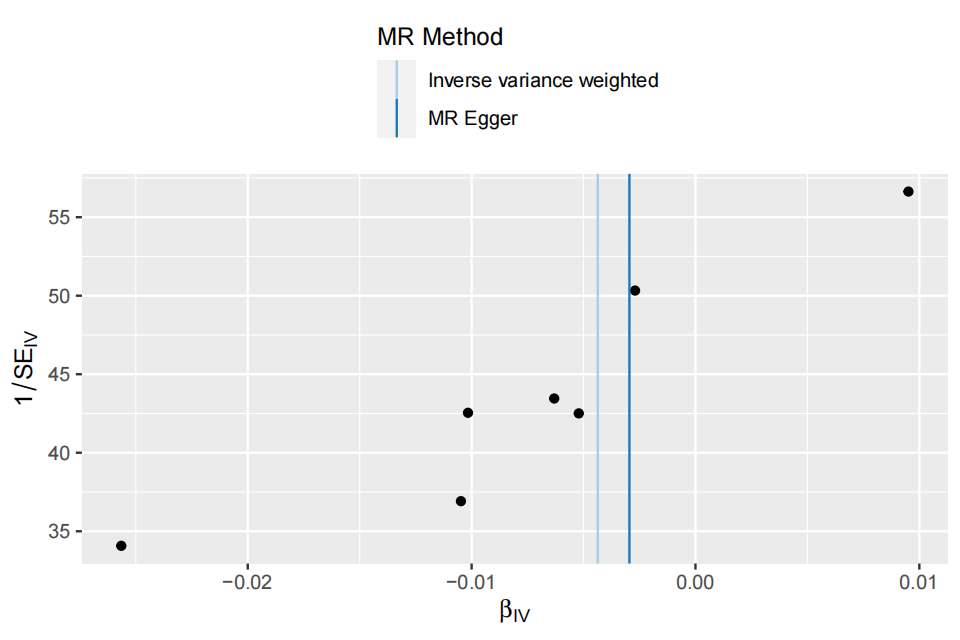


**Figure S17** Funnel plot for genetically predicted low grip strength on sleep duration.


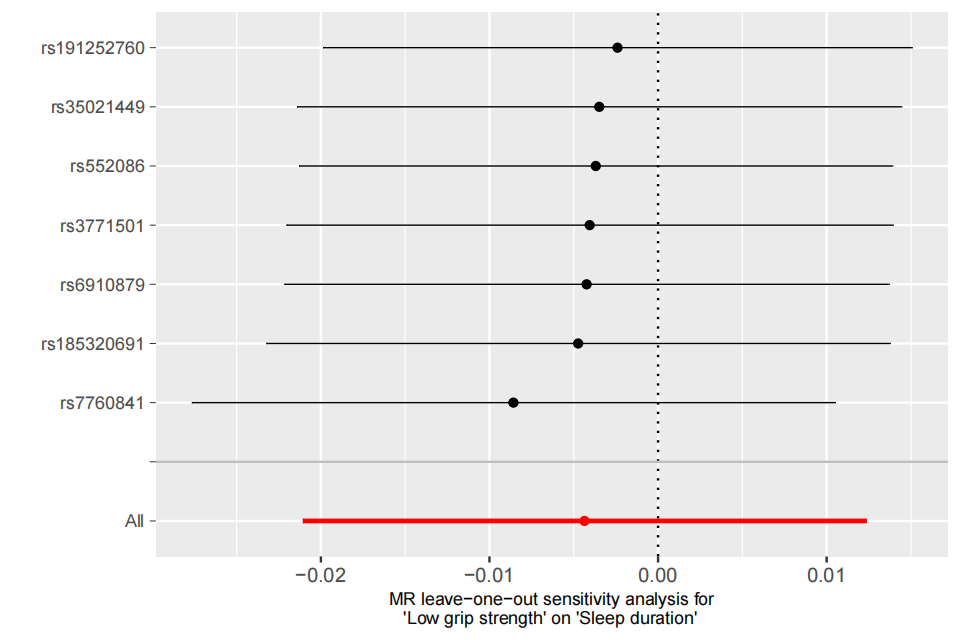


**Figure S18** Leave-one-out analysis for genetically predicted low grip strength on sleep duration.


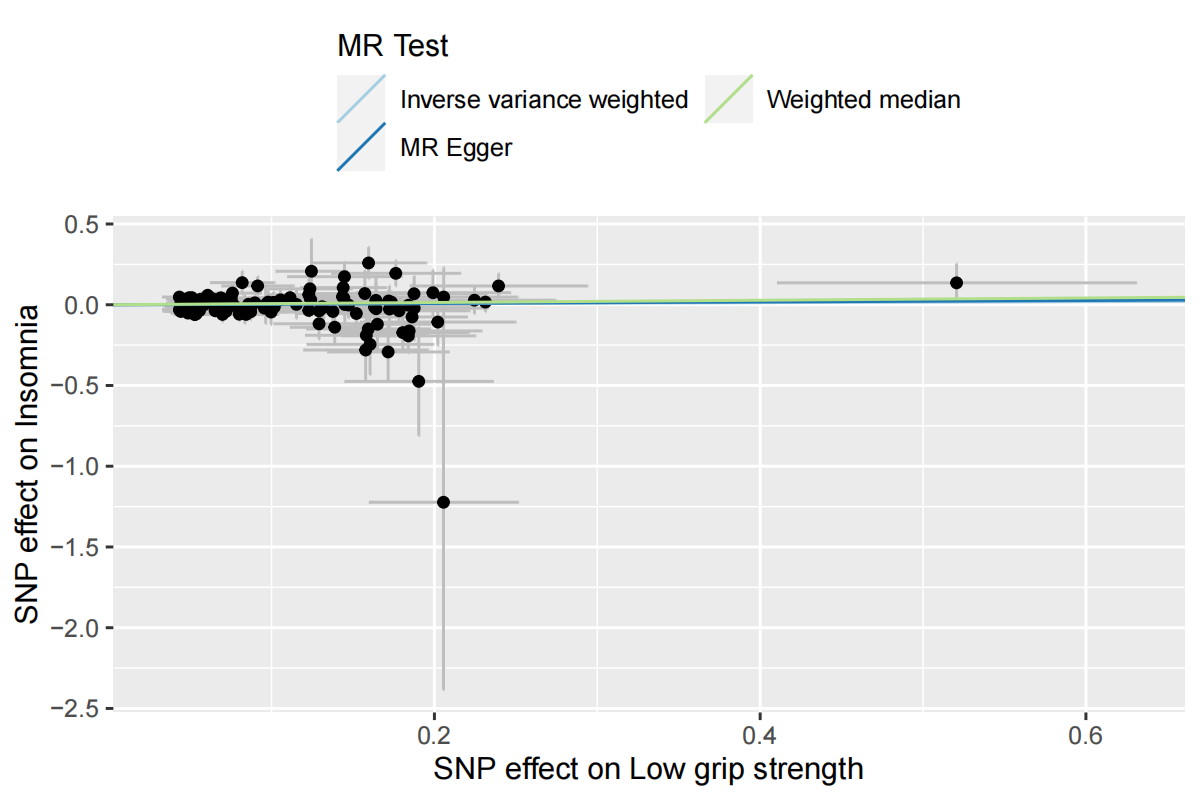


**Figure S19** Scatterplot for genetically predicted low grip strength on insomnia.


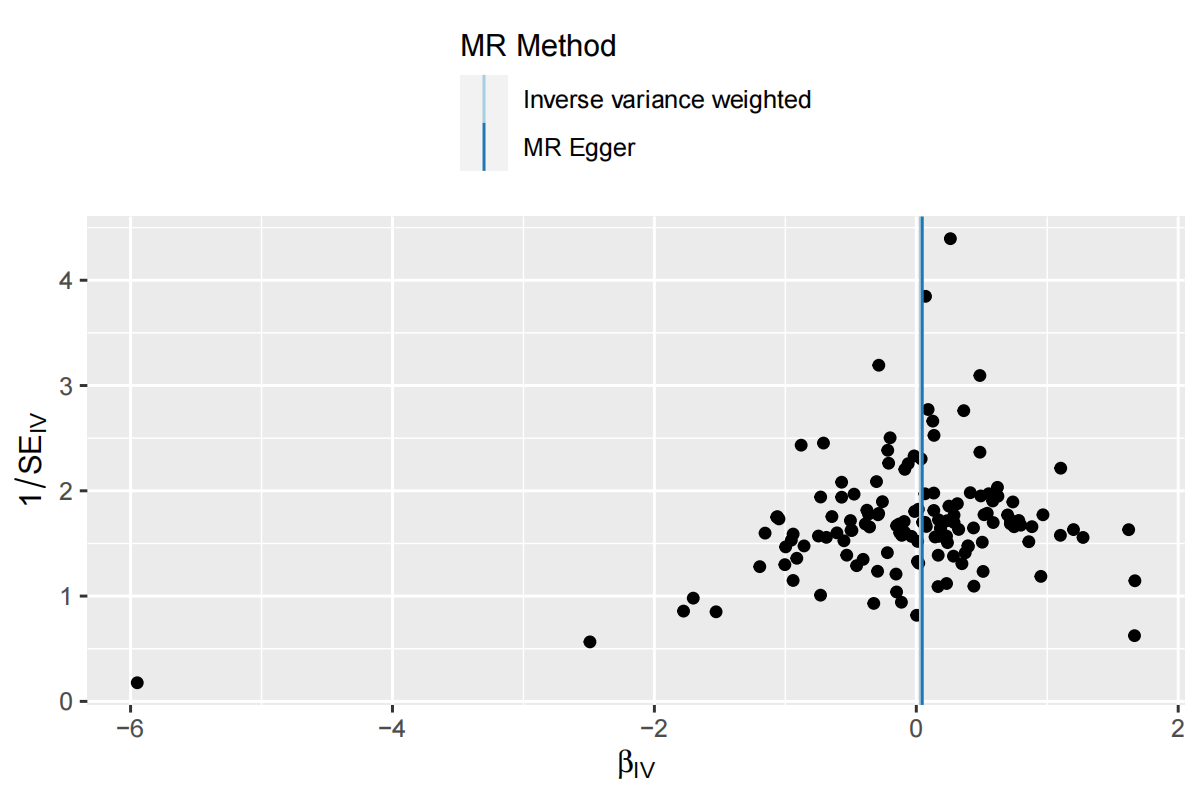


**Figure S20** Funnel plot for genetically predicted low grip strength on insomnia.


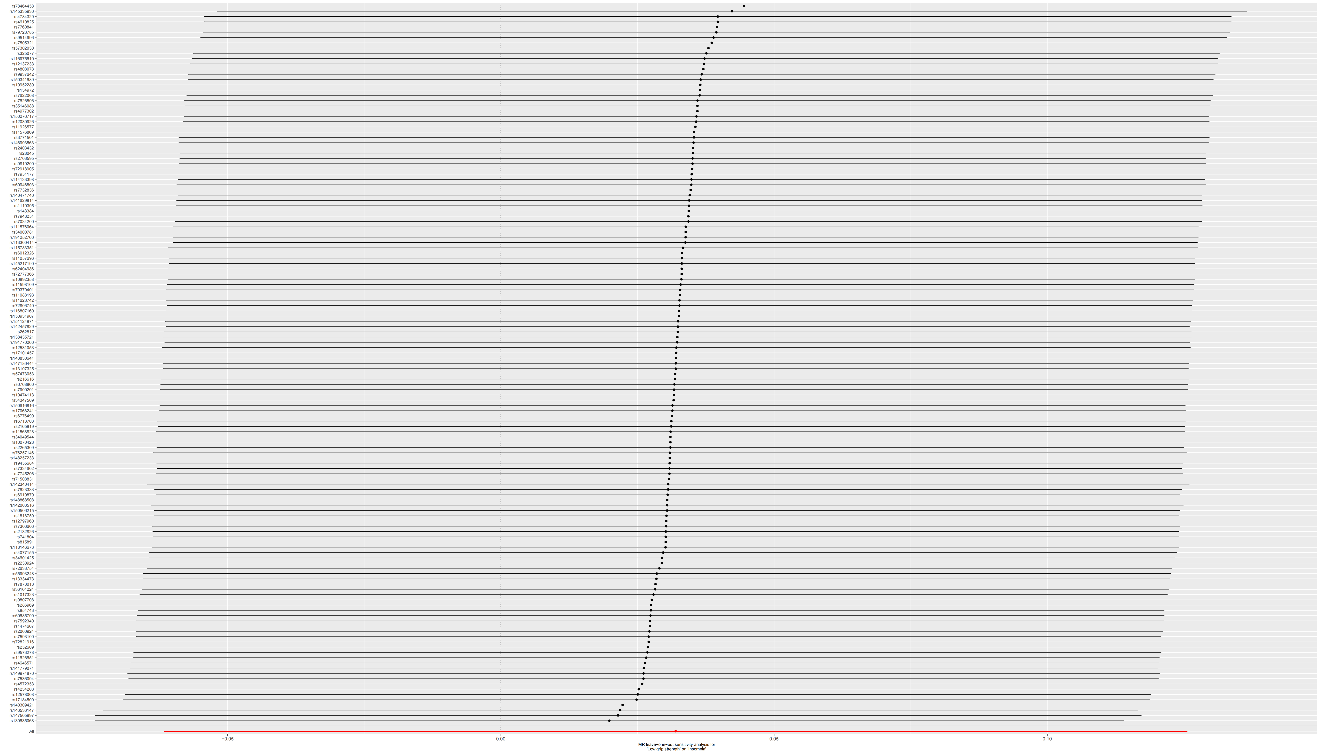


**Figure S21** Leave-one-out analysis for genetically predicted low grip strength on insomnia.


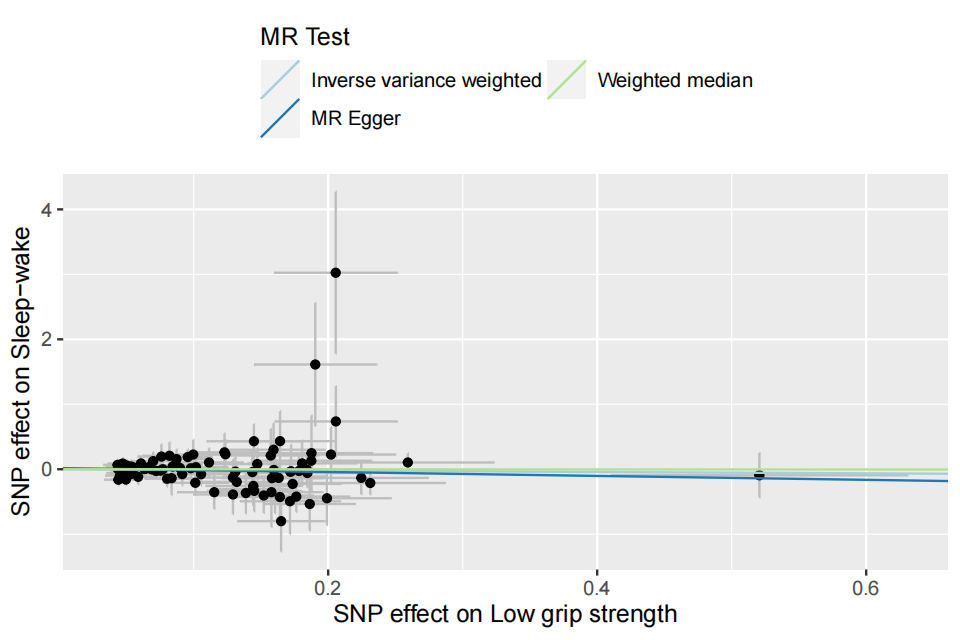


**Figure S22** Scatterplot for genetically predicted low grip strength on sleep-wake disorders.


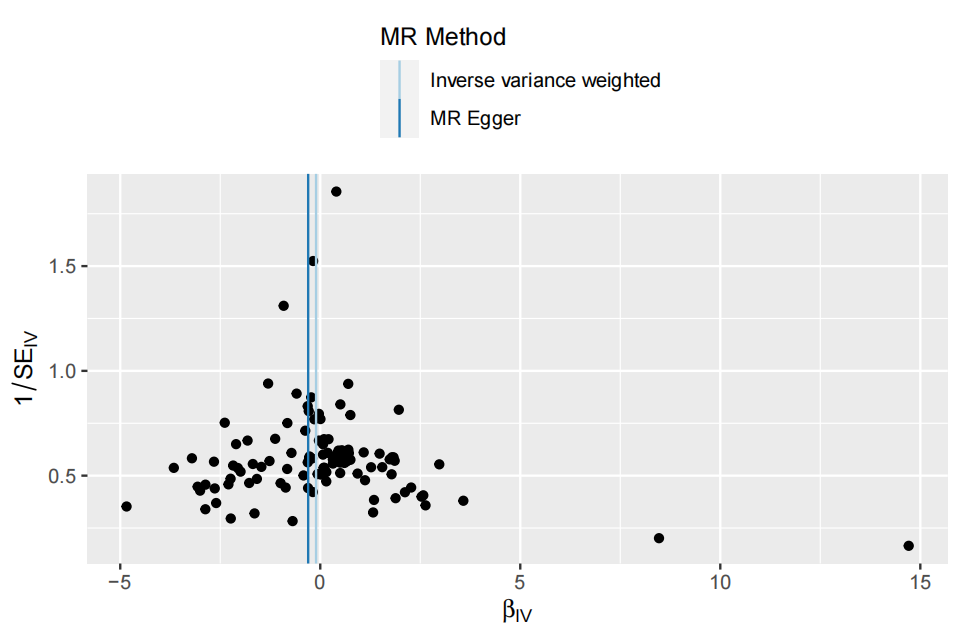


**Figure S23** Funnel plot for genetically predicted low grip strength on sleep-wake disorders.


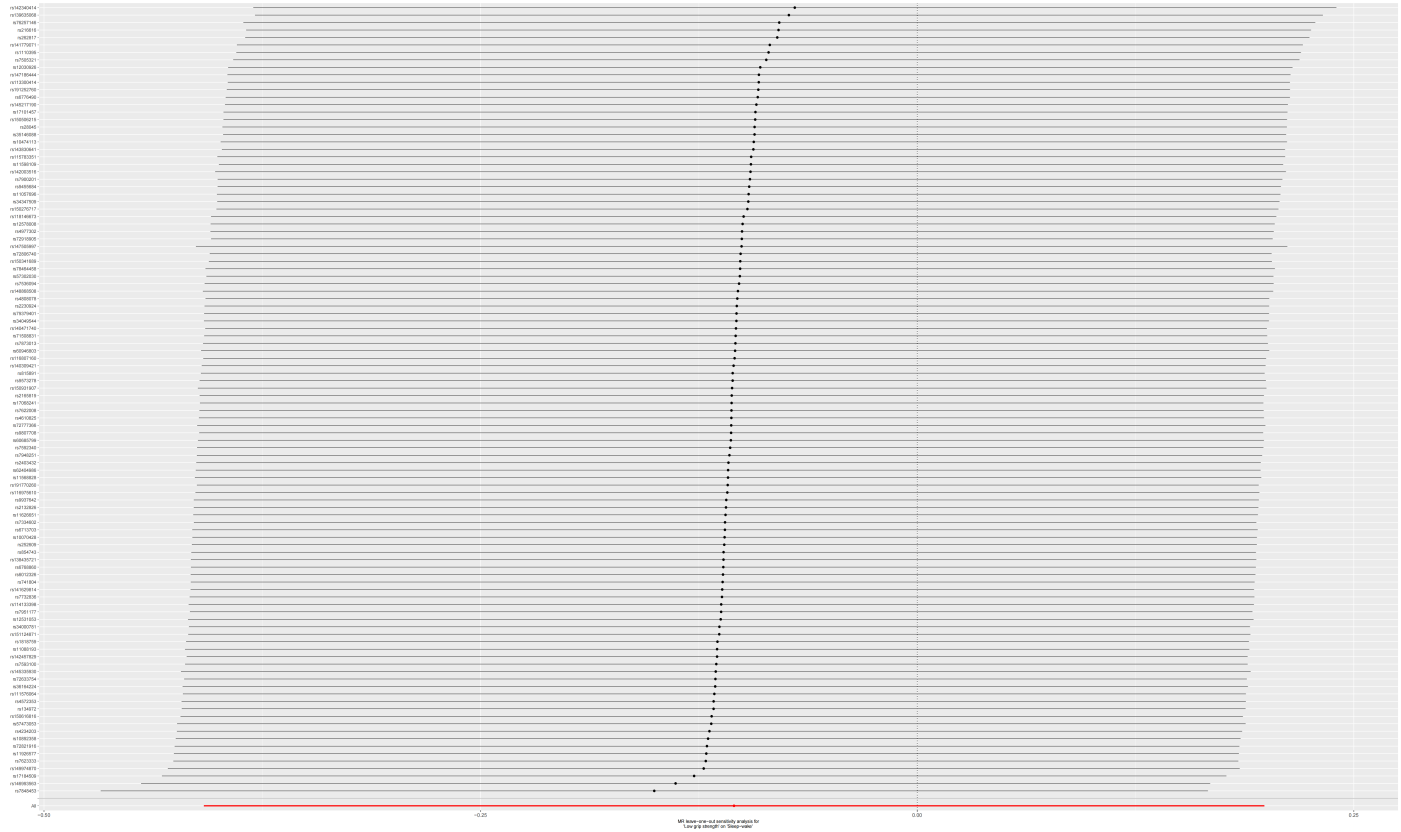


**Figure S24** Leave-one-out analysis for genetically predicted low grip strength on sleep-wake disorders.


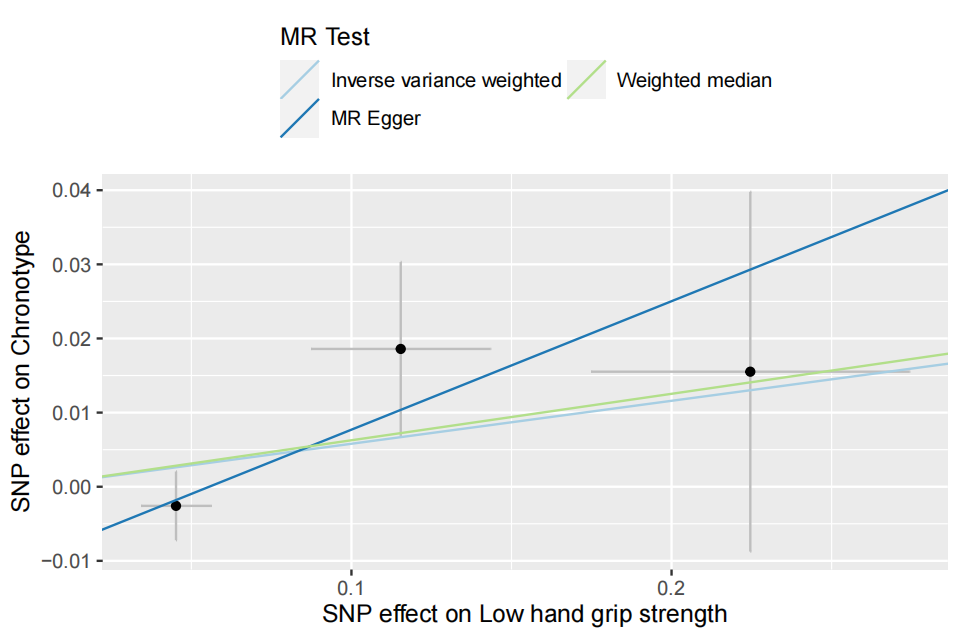


**Figure S25** Scatterplot for genetically predicted low grip strength on chronotype.


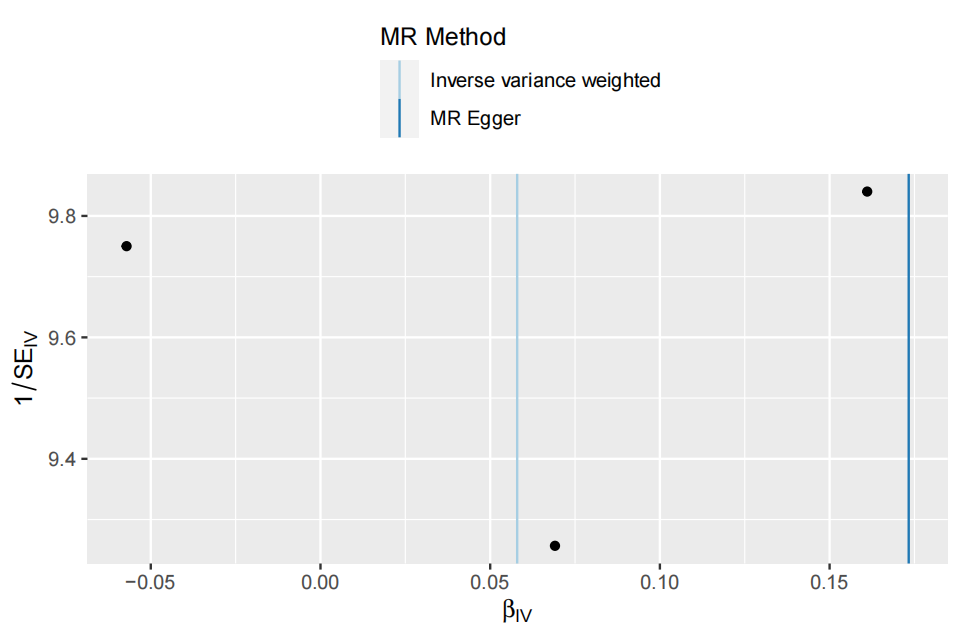


**Figure S26** Funnel plot for genetically predicted low grip strength on chronotype.


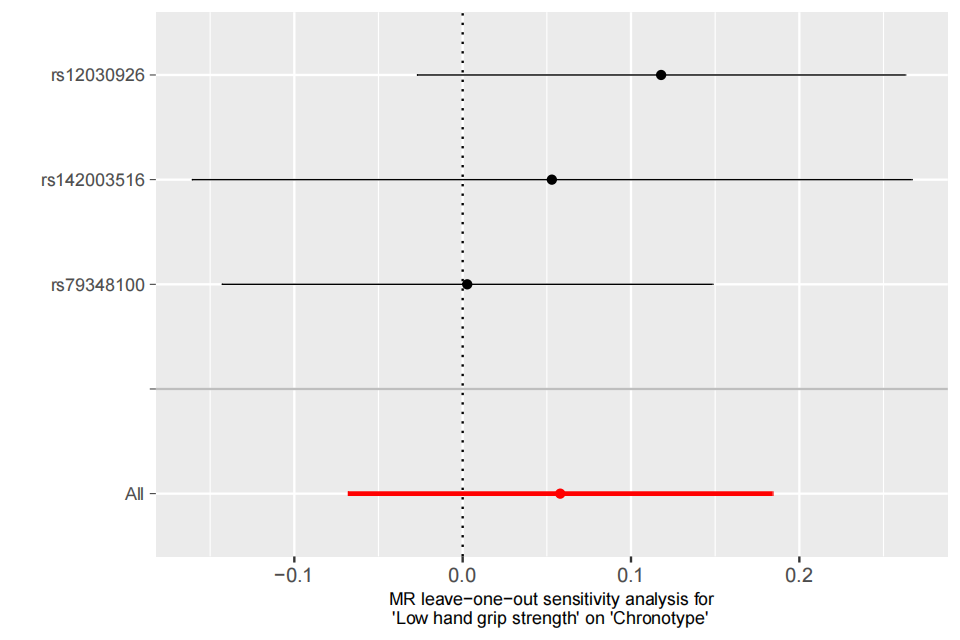


**Figure S27** Leave-one-out analysis for genetically predicted low grip strength on chronotype.

**2 Supplementary Tables**

**Table S1** STROBE-MR checklist.

| **Item** | **Complete/location** |
| --- | --- |
| **Title and Abstract:** "Mendelian randomization" is named both in the title and the abstract | Complete. |
| **Introduction** |  |
| **Background:** Explain the scientific background and rationale for the reported study. Is causality between exposure and outcome plausible? Justify why MR is a helpful method to address the study question. | In the first and second paragraphs of the introduction, we discussed why sleep traits are a plausible causal exposure for low grip strength risk. In the next paragraphs, we discussed why Mendelian randomization is a reasonable approach to investigate the potential relationship between sleep traits and low grip strength. |
| **Objectives:** State specific objectives clearly, including pre-specified causal hypotheses (if any). | we aimed to determine whether there is a causal association between sleep traits (sleep duration, insomnia, daytime napping, sleep-wake disorder, chronotype) and low grip strength risk. |
| **Methods** |  |
| **Study design and data sources:** Present key elements of study design early in the paper. Consider including a table listing sources of data for all phases of the study. For each data source contributing to the analysis, describe the following:  a) Describe the study design and the underlying population from which it was drawn. Describe also the setting, locations, and relevant dates, including periods of recruitment, exposure, follow-up, and data collection, if available.  b) Give the eligibility criteria, and the sources and methods of selection of participants.  c) Explain how the analyzed sample size was arrived at.  d) Describe measurement, quality and selection of genetic variants.  e) For each exposure, outcome and other relevant variables, describe methods of assessment and, in the case of diseases, the diagnostic criteria used.  f) Provide details of ethics committee approval and participant informed consent, if relevant. | Available information about the GWAS studies is provided in the Table1 in the article, and the section “Data sources”. Further information is given in each of the original GWAS studies.  All original studies included in the genome-wide association study (GWAS) datasets were ethically approved, and informed consent was obtained from all participants.  Selection of genetic variants is described in "Genetic instruments selection" in the Materials and Methods section. |
| **Assumptions:** Explicitly state assumptions for the main analysis (e.g. relevance, exclusion, independence, homogeneity) as well assumptions for any additional or sensitivity analysis. | Described in the "Study design" section of the methods. |
| **Statistical methods main analysis**  Describe statistical methods and statistics used.  a) Describe how quantitative variables were handled in the analyses (i.e., scale, units, model).  b) Describe the process for identifying genetic variants and weights to be included in the  analyses (i.e, independence and model). Consider a flow diagram.  c) Describe the MR estimator, e.g. two-stage least squares, Wald ratio, and related statistics.  Detail the included covariates and, in case of two-sample MR, whether the same covariate set was used for adjustment in the two samples.  d) Explain how missing data were addressed.  e) If applicable, say how multiple testing was dealt with. | (a) Described in the "Statistical Analyses" section of the methods  b) Described in the "Statistical Analyses" section of the methods  c) Described in the "Statistical Analyses" section of the methods  d) Described in the "Statistical Analyses" section of the methods  e) Described in the "Statistical Analyses" section of the methods |
| **Assessment of assumptions: Describe any methods used to assess the assumptions or justify their validity.** | Our test for instrument heterogeneity is described in the "Statistical analyses" section. |
| **Sensitivity analyses:** Describe any sensitivity analyses or additional analyses performed. | Our test of instrument sensitivity is described in the "Statistical analyses" section of the Materials and Method section. |
| **Software and pre-registration**  a) Name statistical software and package(s), including version and settings used.  b) State whether the study protocol and details were pre-registered (as well as when and  where). | a) All statistical software and settings used are described in the "Statistical analyses" section of the Materials and methods section.  b) The analysis plan is described in the "Materials and Methods". |
| **Results** |  |
| **Descriptive data**  a) Report the numbers of individuals at each stage of included studies and reasons for exclusion. Consider use of a flow-diagram.  b) Report summary statistics for phenotypic exposure(s), outcome(s) and other relevant variables (e.g. means, standard deviations, proportions).  c) If the data sources include meta-analyses of previous studies, provide the number of studies, their reported ancestry, if available, and assessments of heterogeneity across these studies. Consider using a supplementary table for each data source.  d) For two-sample Mendelian randomization:  i. Provide information on the similarity of the genetic variant-exposure associations between the exposure and outcome samples.  ii. Provide information on extent of sample overlap between the exposure and outcome data sources. | a) Information is given in the "Data sources" section of the Materials and methods.  b) We give the summary statistics for our instruments in Supplementary Tables S2. Summary statistics are also available from each GWAS as described in the Table 1.  c) We give this information, when available, in the "Data sources" section.  d) We provide this information in the "Statistical Analyses" section. |
| **Main results**  a) Report the associations between genetic variant and exposure, and between genetic variant and outcome, preferably on an interpretable scale (e.g. comparing 25th and 75th percentile of allele count or genetic risk score, if individual-level data available).  b) Report causal effect estimate between exposure and outcome, and the measures of uncertainty from the MR analysis. Use an intuitive scale, such as odds ratio, or relative  risk, per standard deviation difference.  c) If relevant, consider translating estimates of relative risk into absolute risk for a meaningful time-period.  d) Consider any plots to visualize results (e.g. forest plot, scatterplot of associations between genetic variants and outcome versus between genetic variants and exposure). | Our results are given in terms of odds ratio and confidence intervals throughout the results section. We visualize results using a forest plot in Figure 2 and scatter plots of SNP effects on exposures versus outcomes in Figure 3 and Figure 4. |
| **Assessment of assumptions**  a) Assess the validity of the assumptions.  b) Report any additional statistics (e.g., assessments of heterogeneity, such as I2, Q statistic). | a) We assess the validity using sensitivity analyses, described in the "Results" section.  b) We discuss the use of Cochran's Q statistic, MR-Egger intercept test in the Results section. |
| **Sensitivity and additional analyses**  a) Use sensitivity analyses to assess the robustness of the main results to violations of the assumptions.  b) Report results from other sensitivity analyses (e.g., replication study with different dataset, analyses of subgroups, validation of instrument(s), simulations, etc.).  c) Report any assessment of direction of causality (e.g., bidirectional MR).  d) When relevant, report and compare with estimates from non-MR analyses.  e) Consider any additional plots to visualize results (e.g., leave-one-out analyses). | Described in the Results section. |
| **Discussion** |  |
| **Key results** | We found that sleep duration is causally negatively associated with low grip strength (OR = 0.62, 95%CI = 0.42 – 0.90, *P* = 0.012 < 0.05). Sleep-wake disorders have a positive association with low grip strength (OR = 1.02, 95%CI = 1.01 - 1.03, P = 0.020 < 0.05). Higher risk of low grip strength was causally associated with increased daytime napping (OR = 1.018, 95%CI = 1.004 – 1.032, P = 0.011 < 0.05). |
| **Limitations**  Discuss limitations of the study, taking into account the validity of the MR assumptions, other sources of potential bias, and imprecision. Discuss both direction and magnitude of any potential bias, and any efforts to address them. | The limitations of the study were discussed in the “discussion” section. |
| **Interpretations**  a) Give a cautious overall interpretation of results considering objectives and limitations.  Compare with results from other relevant studies.  b) Discuss underlying biological mechanisms that could be modelled by using the genetic  variants to assess the relationship between the exposure and the outcome.  c) Discuss whether the results have clinical or policy relevance, and whether interventions  could have the same size effect. | a) This entry is discussed at maximum length in the article, and the MR results are rationalised by comparison with several published studies.  b) The article describes the biological mechanisms, sleep traits may related to the regulation of the skeletal muscle circadian clock.  c) Understanding their relationship contributes to providing a theoretical basis for clinical improvement of life quality in the elderly. |
| **Generalizability:** | We discussed potential caveats in terms of generalizing our findings in “discussion” section. |
| **Funding:** | We have reported all sources of funding. |
| **Data and data sharing:** | Described in Data Availability Statement |
| **Conflicts of Interest:** | All authors have declared conflicts of interest. |

**Table S2** List of SNPs for 5 sleep phenotypes and low handgrip strength.

| **Exposure** | **Outcome** | **SNP** | **Effect allele exposure** | **Other allele exposure** | **Effect allele outcome** | **Other allele outcome** | **Beta exposure** | **Beta outcome** |
| --- | --- | --- | --- | --- | --- | --- | --- | --- |
| Sleep duration | Low grip strength | rs10510128 | A | G | A | G | 0.0114031 | 0.0049 |
| Sleep duration | Low grip strength | rs112100783 | A | G | A | G | -0.0252948 | -0.0363 |
| Sleep duration | Low grip strength | rs113113059 | C | T | C | T | -0.0111278 | 0.0032 |
| Sleep duration | Low grip strength | rs11621908 | T | C | T | C | -0.019985 | 0.016 |
| Sleep duration | Low grip strength | rs11643715 | G | C | G | C | 0.0109493 | 0.0208 |
| Sleep duration | Low grip strength | rs11650677 | A | G | A | G | 0.0111701 | -0.0231 |
| Sleep duration | Low grip strength | rs11982852 | T | C | T | C | -0.0117257 | -0.0037 |
| Sleep duration | Low grip strength | rs12518468 | C | T | C | T | -0.0106435 | 0.0175 |
| Sleep duration | Low grip strength | rs12567114 | A | G | A | G | 0.0123378 | -0.0135 |
| Sleep duration | Low grip strength | rs1348047 | T | G | T | G | -0.012642 | 0.0069 |
| Sleep duration | Low grip strength | rs1463053 | A | G | A | G | 0.0092696 | 0.0043 |
| Sleep duration | Low grip strength | rs151014368 | A | G | A | G | 0.0113794 | 0.0026 |
| Sleep duration | Low grip strength | rs1553132 | G | A | G | A | 0.0105257 | 0.003 |
| Sleep duration | Low grip strength | rs17391944 | G | T | G | T | 0.0218515 | 0.005 |
| Sleep duration | Low grip strength | rs1939455 | T | G | T | G | -0.0158002 | 0.0292 |
| Sleep duration | Low grip strength | rs1972712 | C | T | C | T | 0.011796 | 0.0132 |
| Sleep duration | Low grip strength | rs2072727 | C | T | C | T | -0.00926905 | -0.0197 |
| Sleep duration | Low grip strength | rs2079070 | G | C | G | C | -0.0134358 | 0.0103 |
| Sleep duration | Low grip strength | rs2748809 | C | T | C | T | -0.00925348 | 0.0113 |
| Sleep duration | Low grip strength | rs34354917 | A | C | A | C | -0.0100207 | -0.0152 |
| Sleep duration | Low grip strength | rs365663 | G | A | G | A | -0.00928337 | 0.0153 |
| Sleep duration | Low grip strength | rs4767550 | G | A | G | A | 0.0108732 | -0.0092 |
| Sleep duration | Low grip strength | rs56367859 | G | A | G | A | 0.0116218 | -0.0111 |
| Sleep duration | Low grip strength | rs6681755 | A | G | A | G | 0.0115272 | -0.0045 |
| Sleep duration | Low grip strength | rs6783516 | T | G | T | G | -0.00983781 | 0.0025 |
| Sleep duration | Low grip strength | rs72831782 | A | T | A | T | -0.0101806 | 0.0159 |
| Sleep duration | Low grip strength | rs7517981 | C | T | C | T | -0.0099657 | 0.0141 |
| Sleep duration | Low grip strength | rs75539574 | C | A | C | A | 0.0236649 | -0.0167 |
| Sleep duration | Low grip strength | rs7644809 | C | T | C | T | -0.0101517 | 0.0052 |
| Sleep duration | Low grip strength | rs7711696 | T | G | T | G | -0.00986657 | 0.0158 |
| Sleep duration | Low grip strength | rs8038326 | G | A | G | A | -0.0133838 | 0.022 |
| Sleep duration | Low grip strength | rs8074498 | A | T | A | T | -0.00932835 | -0.0159 |
| Sleep duration | Low grip strength | rs915416 | G | C | G | C | -0.0127275 | 0.0011 |
| Sleep duration | Low grip strength | rs9345234 | C | A | C | A | 0.0091922 | -0.0253 |
| Sleep duration | Low grip strength | rs9382445 | C | T | C | T | -0.00948383 | 0.005 |
| Sleep duration | Low grip strength | rs9810474 | T | C | T | C | -0.0111549 | 0.0176 |
| Insomnia | Low grip strength | rs10202315 | C | T | C | T | 0.154451 | 0.0083 |
| Insomnia | Low grip strength | rs10445632 | G | T | G | T | 0.123814 | -0.0054 |
| Insomnia | Low grip strength | rs10809638 | T | G | T | G | -0.113208 | 0.0032 |
| Insomnia | Low grip strength | rs111354704 | C | A | C | A | 0.427681 | 0.0465 |
| Insomnia | Low grip strength | rs114377420 | C | T | C | T | 0.59524 | 0.0239 |
| Insomnia | Low grip strength | rs114770259 | T | C | T | C | -0.334441 | -0.0177 |
| Insomnia | Low grip strength | rs115951138 | A | G | A | G | 0.383986 | -0.0334 |
| Insomnia | Low grip strength | rs116271223 | A | G | A | G | -1.1165 | 0.0333 |
| Insomnia | Low grip strength | rs116385677 | A | G | A | G | -0.24217 | 0.0164 |
| Insomnia | Low grip strength | rs11641592 | A | G | A | G | 0.127718 | 0.0035 |
| Insomnia | Low grip strength | rs11660528 | A | C | A | C | -0.23252 | 0.0045 |
| Insomnia | Low grip strength | rs117130101 | T | C | T | C | 0.172211 | -0.0362 |
| Insomnia | Low grip strength | rs117298161 | C | A | C | A | 0.319658 | -0.0018 |
| Insomnia | Low grip strength | rs117769059 | T | A | T | A | 0.342138 | 0.0143 |
| Insomnia | Low grip strength | rs117914665 | T | C | T | C | 0.717285 | -0.0386 |
| Insomnia | Low grip strength | rs118104214 | T | C | T | C | -0.4272 | 0.051 |
| Insomnia | Low grip strength | rs118157779 | T | G | T | G | -0.252873 | -0.0425 |
| Insomnia | Low grip strength | rs11844858 | T | G | T | G | 0.307384 | -0.0185 |
| Insomnia | Low grip strength | rs12030256 | C | T | C | T | 0.151478 | 0.0073 |
| Insomnia | Low grip strength | rs12581238 | C | T | C | T | 0.154464 | 0.0034 |
| Insomnia | Low grip strength | rs12712518 | T | C | T | C | 0.157459 | -0.0141 |
| Insomnia | Low grip strength | rs13069038 | C | T | C | T | 0.168235 | -0.0035 |
| Insomnia | Low grip strength | rs138480706 | T | C | T | C | 0.468866 | 0.1168 |
| Insomnia | Low grip strength | rs144766287 | T | G | T | G | 0.834922 | -0.0231 |
| Insomnia | Low grip strength | rs147241272 | A | G | A | G | -0.432574 | -0.0949 |
| Insomnia | Low grip strength | rs1475397 | T | C | T | C | 0.149537 | -0.0004 |
| Insomnia | Low grip strength | rs150013578 | C | T | C | T | 0.629541 | -0.0067 |
| Insomnia | Low grip strength | rs150956339 | C | T | C | T | 0.260091 | 0.0405 |
| Insomnia | Low grip strength | rs151026942 | T | C | T | C | -0.6418 | 0.0152 |
| Insomnia | Low grip strength | rs1571211 | C | G | C | G | 0.11509 | 0.0033 |
| Insomnia | Low grip strength | rs17291465 | G | A | G | A | 0.325324 | -0.0024 |
| Insomnia | Low grip strength | rs17301780 | A | C | A | C | 0.316082 | 0.0039 |
| Insomnia | Low grip strength | rs17540667 | T | A | T | A | -0.263298 | 0.0114 |
| Insomnia | Low grip strength | rs17692260 | A | G | A | G | 0.175641 | -0.0085 |
| Insomnia | Low grip strength | rs184316802 | C | T | C | T | 0.369605 | 0.0005 |
| Insomnia | Low grip strength | rs184545389 | C | T | C | T | -1.23916 | 0.0173 |
| Insomnia | Low grip strength | rs1883980 | C | T | C | T | 0.114186 | 0.0034 |
| Insomnia | Low grip strength | rs2303666 | T | C | T | C | 0.16114 | 0.0514 |
| Insomnia | Low grip strength | rs247615 | G | A | G | A | 0.163042 | 0.0157 |
| Insomnia | Low grip strength | rs2562635 | G | A | G | A | -0.215705 | -0.0181 |
| Insomnia | Low grip strength | rs2901199 | C | T | C | T | -0.124802 | 0.0032 |
| Insomnia | Low grip strength | rs2952019 | G | A | G | A | -0.647657 | 0.0688 |
| Insomnia | Low grip strength | rs41296342 | G | T | G | T | 0.192192 | 0.0204 |
| Insomnia | Low grip strength | rs4378518 | C | T | C | T | -0.130089 | -0.0056 |
| Insomnia | Low grip strength | rs449146 | C | G | C | G | 0.137545 | 0.0063 |
| Insomnia | Low grip strength | rs4777292 | G | A | G | A | -0.162879 | -0.0256 |
| Insomnia | Low grip strength | rs4953493 | A | G | A | G | 0.111841 | 0.0006 |
| Insomnia | Low grip strength | rs58089352 | C | T | C | T | -0.592599 | 0.0179 |
| Insomnia | Low grip strength | rs61185203 | T | G | T | G | -0.251634 | -0.0112 |
| Insomnia | Low grip strength | rs61686871 | G | A | G | A | -0.168052 | -0.0122 |
| Insomnia | Low grip strength | rs62487108 | C | A | C | A | -0.218349 | -0.0072 |
| Insomnia | Low grip strength | rs62502883 | A | G | A | G | -0.404056 | -0.0383 |
| Insomnia | Low grip strength | rs6702921 | T | C | T | C | -0.193185 | -0.0102 |
| Insomnia | Low grip strength | rs72762677 | A | G | A | G | -0.155821 | -0.0134 |
| Insomnia | Low grip strength | rs72806786 | G | A | G | A | 0.359571 | -0.0137 |
| Insomnia | Low grip strength | rs72823107 | C | T | C | T | 0.197243 | 0.0002 |
| Insomnia | Low grip strength | rs72930919 | A | G | A | G | 0.759772 | 0.0519 |
| Insomnia | Low grip strength | rs73052997 | T | A | T | A | 0.227825 | 0.018 |
| Insomnia | Low grip strength | rs73163070 | C | T | C | T | -0.668436 | -0.0048 |
| Insomnia | Low grip strength | rs73229583 | T | C | T | C | -0.668568 | 0.0059 |
| Insomnia | Low grip strength | rs75434914 | A | G | A | G | -0.624442 | -0.0721 |
| Insomnia | Low grip strength | rs7608793 | T | C | T | C | -0.132138 | -0.0039 |
| Insomnia | Low grip strength | rs7641849 | C | T | C | T | 0.627066 | 0.0666 |
| Insomnia | Low grip strength | rs76805387 | C | T | C | T | 0.205442 | -0.0217 |
| Insomnia | Low grip strength | rs7855779 | T | C | T | C | 0.11418 | 0.0085 |
| Insomnia | Low grip strength | rs7855885 | T | C | T | C | 0.168615 | -0.002 |
| Insomnia | Low grip strength | rs78783667 | A | G | A | G | -0.221644 | -0.0304 |
| Insomnia | Low grip strength | rs79958742 | A | G | A | G | 0.594851 | 0.0068 |
| Insomnia | Low grip strength | rs807827 | G | A | G | A | -0.183002 | -0.0105 |
| Insomnia | Low grip strength | rs9470080 | C | T | C | T | 0.134988 | -0.0155 |
| Insomnia | Low grip strength | rs975222 | C | T | C | T | -0.130123 | 0.0092 |
| Sleep-wake | Low grip strength | rs10839922 | G | A | G | A | 0.345424 | 0.0087 |
| Sleep-wake | Low grip strength | rs10968089 | C | A | C | A | -0.3459 | -0.0022 |
| Sleep-wake | Low grip strength | rs118185169 | T | A | T | A | -0.610935 | 0.0152 |
| Sleep-wake | Low grip strength | rs12410249 | G | A | G | A | -0.368503 | -0.0062 |
| Sleep-wake | Low grip strength | rs12514436 | C | T | C | T | 0.397043 | 0.0119 |
| Sleep-wake | Low grip strength | rs140138948 | G | T | G | T | 0.906879 | 0.0387 |
| Sleep-wake | Low grip strength | rs142125712 | A | G | A | G | 0.891742 | 0.0353 |
| Sleep-wake | Low grip strength | rs142399152 | C | G | C | G | 0.871394 | -0.0223 |
| Sleep-wake | Low grip strength | rs143704363 | G | A | G | A | 0.582903 | 0.0464 |
| Sleep-wake | Low grip strength | rs17124590 | T | A | T | A | 0.790764 | 0.0431 |
| Sleep-wake | Low grip strength | rs17817006 | T | C | T | C | -0.340407 | -0.0247 |
| Sleep-wake | Low grip strength | rs201120445 | C | G | A | G | 3.01792 | 0.0166 |
| Sleep-wake | Low grip strength | rs2268911 | T | A | T | A | 0.451994 | 0.0184 |
| Sleep-wake | Low grip strength | rs2287761 | C | G | C | G | -0.490733 | -0.0082 |
| Sleep-wake | Low grip strength | rs4507983 | T | A | T | A | 0.391357 | 0.0098 |
| Sleep-wake | Low grip strength | rs4811315 | G | T | G | T | 1.33585 | -0.004 |
| Sleep-wake | Low grip strength | rs4846475 | C | T | C | T | -0.356578 | -0.0081 |
| Sleep-wake | Low grip strength | rs4852139 | C | T | C | T | -0.331468 | 0.0032 |
| Sleep-wake | Low grip strength | rs6035929 | G | A | G | A | 1.11153 | 0.0839 |
| Sleep-wake | Low grip strength | rs62067360 | T | C | T | C | 1.00504 | 0.0132 |
| Sleep-wake | Low grip strength | rs72792649 | A | G | A | G | 0.760129 | -0.002 |
| Sleep-wake | Low grip strength | rs76937132 | C | T | C | T | 1.30498 | -0.011 |
| Sleep-wake | Low grip strength | rs77256089 | T | C | T | C | 1.04394 | 0.0534 |
| Sleep-wake | Low grip strength | rs7975365 | G | A | G | A | -0.515504 | -0.0083 |
| Sleep-wake | Low grip strength | rs79942405 | C | T | C | T | 0.764548 | -0.0607 |
| Daytime napping | Low grip strength | rs1001817 | C | T | C | T | 0.00775426 | -0.0056 |
| Daytime napping | Low grip strength | rs10875606 | C | A | C | A | 0.00737707 | 0.0105 |
| Daytime napping | Low grip strength | rs10875622 | G | A | G | A | -0.0104621 | 0.0008 |
| Daytime napping | Low grip strength | rs11125776 | T | G | T | G | 0.0116502 | 0.0278 |
| Daytime napping | Low grip strength | rs11258652 | C | A | C | A | 0.0104004 | -0.006 |
| Daytime napping | Low grip strength | rs11615756 | C | T | C | T | -0.0182673 | 0.0111 |
| Daytime napping | Low grip strength | rs12031519 | A | G | A | G | 0.0112838 | -0.0091 |
| Daytime napping | Low grip strength | rs12042846 | T | C | T | C | -0.00901497 | 0.0021 |
| Daytime napping | Low grip strength | rs12346996 | T | C | T | C | 0.00796106 | 0.0023 |
| Daytime napping | Low grip strength | rs12451365 | T | C | T | C | -0.010628 | -0.0045 |
| Daytime napping | Low grip strength | rs12657723 | C | T | C | T | -0.00818319 | 0.005 |
| Daytime napping | Low grip strength | rs12992648 | A | G | A | G | 0.00765323 | 0.0036 |
| Daytime napping | Low grip strength | rs13033444 | A | G | A | G | -0.00974179 | -0.0318 |
| Daytime napping | Low grip strength | rs13173576 | T | G | T | G | -0.00681584 | 0.0054 |
| Daytime napping | Low grip strength | rs13284688 | T | C | T | C | -0.0150717 | 0.0078 |
| Daytime napping | Low grip strength | rs140506252 | A | T | A | T | 0.0227261 | 0.0023 |
| Daytime napping | Low grip strength | rs1415218 | T | C | T | C | 0.00820697 | 0.0009 |
| Daytime napping | Low grip strength | rs1601440 | C | T | C | T | 0.00912653 | 0.0029 |
| Daytime napping | Low grip strength | rs17502738 | T | C | T | C | 0.00870459 | -0.0114 |
| Daytime napping | Low grip strength | rs1883048 | T | C | T | C | -0.00787143 | -0.0074 |
| Daytime napping | Low grip strength | rs2143792 | G | A | G | A | 0.00713406 | -0.0136 |
| Daytime napping | Low grip strength | rs2202323 | G | C | G | C | 0.00758702 | -0.0118 |
| Daytime napping | Low grip strength | rs2284015 | C | G | C | G | -0.00771167 | 0.0154 |
| Daytime napping | Low grip strength | rs2370926 | T | C | T | C | 0.00813213 | -0.0069 |
| Daytime napping | Low grip strength | rs2699869 | A | C | A | C | 0.00678084 | -0.006 |
| Daytime napping | Low grip strength | rs2769916 | G | A | G | A | -0.00875328 | -0.01 |
| Daytime napping | Low grip strength | rs2861805 | A | G | A | G | 0.0093112 | -0.0159 |
| Daytime napping | Low grip strength | rs2943023 | C | T | C | T | 0.00710422 | -0.0002 |
| Daytime napping | Low grip strength | rs295278 | G | A | G | A | 0.00787804 | 0.0065 |
| Daytime napping | Low grip strength | rs34262487 | C | A | C | A | 0.0145107 | -0.0004 |
| Daytime napping | Low grip strength | rs35011311 | G | T | G | T | 0.009082 | 0.0185 |
| Daytime napping | Low grip strength | rs350785 | T | C | T | C | 0.0126479 | 0.0085 |
| Daytime napping | Low grip strength | rs35851551 | A | G | A | G | 0.011194 | 0.0209 |
| Daytime napping | Low grip strength | rs3810484 | A | G | A | G | 0.00684147 | -0.0002 |
| Daytime napping | Low grip strength | rs4356873 | T | C | T | C | -0.00775689 | 0.0119 |
| Daytime napping | Low grip strength | rs467897 | G | A | G | A | 0.00955698 | 0.0104 |
| Daytime napping | Low grip strength | rs73817091 | C | T | C | T | -0.0165127 | 0.0116 |
| Daytime napping | Low grip strength | rs7422655 | C | T | C | T | 0.00783348 | 0.0028 |
| Daytime napping | Low grip strength | rs75932578 | C | T | C | T | -0.00904281 | -0.0221 |
| Daytime napping | Low grip strength | rs77154532 | A | G | A | G | 0.00769324 | 0.0137 |
| Daytime napping | Low grip strength | rs7814873 | C | T | C | T | 0.00720972 | -0.0076 |
| Daytime napping | Low grip strength | rs785145 | T | G | T | G | -0.0069889 | 0.0006 |
| Daytime napping | Low grip strength | rs908442 | A | T | A | T | 0.0102781 | -0.0069 |
| Daytime napping | Low grip strength | rs910187 | G | A | G | A | 0.00731754 | -0.0111 |
| Daytime napping | Low grip strength | rs936944 | G | A | G | A | 0.00913528 | -0.0013 |
| Daytime napping | Low grip strength | rs962247 | G | A | G | A | 0.00796355 | -0.0016 |
| Daytime napping | Low grip strength | rs9939355 | C | T | C | T | 0.00726404 | 0.0037 |
| Daytime napping | Low grip strength | rs9998136 | C | G | C | G | -0.00881596 | -0.0264 |
| Chronotype | Low grip strength | rs11121012 | A | G | A | G | -0.0246403 | -0.0122 |
| Chronotype | Low grip strength | rs1537406 | T | C | T | C | 0.0346719 | 0.0121 |
| Chronotype | Low grip strength | rs17374439 | C | T | C | T | -0.0555478 | 0.0016 |
| Chronotype | Low grip strength | rs3767240 | T | C | T | C | -0.0312547 | -0.0096 |
| Chronotype | Low grip strength | rs4661619 | A | G | A | G | -0.0191244 | -0.0008 |
| Chronotype | Low grip strength | rs72645883 | C | T | C | T | -0.0353333 | -0.0043 |
| Chronotype | Low grip strength | rs76277841 | C | G | C | G | 0.0241746 | 0.0085 |
| Low grip strength | Sleep duration | rs185320691 | C | G | C | G | 0.1458 | -0.000393403 |
| Low grip strength | Sleep duration | rs191252760 | G | A | G | A | 0.1863 | -0.00477866 |
| Low grip strength | Sleep duration | rs35021449 | T | C | T | C | 0.1253 | -0.00127327 |
| Low grip strength | Sleep duration | rs3771501 | G | A | G | A | -0.0697 | 0.000439775 |
| Low grip strength | Sleep duration | rs552086 | C | G | C | G | -0.0626 | 0.000655831 |
| Low grip strength | Sleep duration | rs6910879 | G | A | G | A | 0.1245 | -0.000648888 |
| Low grip strength | Sleep duration | rs7760841 | T | C | T | C | 0.1229 | 0.00116935 |
| Low grip strength | Insomnia | rs10070428 | T | G | T | G | 0.046 | 0.00853444 |
| Low grip strength | Insomnia | rs1017323 | T | C | T | C | -0.0703 | -0.0346371 |
| Low grip strength | Insomnia | rs10474113 | A | G | A | G | -0.0546 | -0.00359382 |
| Low grip strength | Insomnia | rs10892358 | A | G | A | G | 0.0467 | -0.00611887 |
| Low grip strength | Insomnia | rs10952289 | T | C | T | C | 0.0551 | -0.0261756 |
| Low grip strength | Insomnia | rs11057696 | T | C | T | C | -0.0523 | 0.0115506 |
| Low grip strength | Insomnia | rs11088193 | T | G | T | G | -0.0451 | 0.00500801 |
| Low grip strength | Insomnia | rs1110395 | A | G | A | G | 0.1521 | -0.0542713 |
| Low grip strength | Insomnia | rs111576064 | T | C | T | C | 0.0997 | -0.0454177 |
| Low grip strength | Insomnia | rs113300414 | A | G | A | G | 0.165 | -0.120612 |
| Low grip strength | Insomnia | rs113853893 | A | T | A | T | -0.1237 | 0.0414723 |
| Low grip strength | Insomnia | rs114133398 | A | G | A | G | -0.087 | 0.0317569 |
| Low grip strength | Insomnia | rs11568828 | T | C | T | C | -0.0898 | -0.0119851 |
| Low grip strength | Insomnia | rs11576869 | T | C | T | C | 0.1377 | -0.0418393 |
| Low grip strength | Insomnia | rs115783351 | A | G | A | G | 0.1632 | -0.0142833 |
| Low grip strength | Insomnia | rs11598109 | T | G | T | G | 0.132 | -0.0166237 |
| Low grip strength | Insomnia | rs11623742 | T | C | T | C | 0.0452 | -0.0040037 |
| Low grip strength | Insomnia | rs11626651 | T | C | T | C | -0.0494 | -0.043628 |
| Low grip strength | Insomnia | rs116807160 | A | G | A | G | 0.1724 | -0.026655 |
| Low grip strength | Insomnia | rs116975610 | A | G | A | G | 0.1806 | -0.172314 |
| Low grip strength | Insomnia | rs118146673 | T | G | T | G | 0.1055 | 0.0304066 |
| Low grip strength | Insomnia | rs11926577 | A | G | A | G | 0.0872 | -0.0438473 |
| Low grip strength | Insomnia | rs12030926 | A | G | A | G | 0.0452 | -0.0273913 |
| Low grip strength | Insomnia | rs12137233 | A | C | A | C | 0.0654 | -0.0372773 |
| Low grip strength | Insomnia | rs12293240 | A | T | A | T | 0.0717 | -0.0211833 |
| Low grip strength | Insomnia | rs12531053 | A | C | A | C | -0.0507 | -0.000789961 |
| Low grip strength | Insomnia | rs12578008 | T | C | T | C | -0.0915 | -0.116536 |
| Low grip strength | Insomnia | rs12682350 | C | G | C | G | 0.0553 | 0.0145899 |
| Low grip strength | Insomnia | rs12797960 | T | C | T | C | -0.0478 | -0.0137963 |
| Low grip strength | Insomnia | rs13107325 | T | C | T | C | 0.0964 | 0.000274355 |
| Low grip strength | Insomnia | rs13334473 | A | C | A | C | 0.0519 | 0.0268621 |
| Low grip strength | Insomnia | rs13403900 | A | T | A | T | -0.1037 | -0.0424176 |
| Low grip strength | Insomnia | rs134972 | A | G | A | G | -0.0699 | 0.0599071 |
| Low grip strength | Insomnia | rs138435721 | T | C | T | C | -0.1473 | 0.0018134 |
| Low grip strength | Insomnia | rs139635068 | T | C | T | C | -0.1763 | -0.194461 |
| Low grip strength | Insomnia | rs140309421 | A | G | A | G | 0.1596 | 0.258856 |
| Low grip strength | Insomnia | rs140471740 | T | C | T | C | 0.1605 | -0.245365 |
| Low grip strength | Insomnia | rs141629814 | A | C | A | C | 0.2021 | -0.107293 |
| Low grip strength | Insomnia | rs141779071 | A | G | A | G | 0.144 | 0.1062 |
| Low grip strength | Insomnia | rs142003516 | A | G | A | G | 0.2246 | 0.0283565 |
| Low grip strength | Insomnia | rs142340414 | T | C | T | C | -0.2313 | -0.0162973 |
| Low grip strength | Insomnia | rs142457829 | A | G | A | G | -0.2056 | 1.22312 |
| Low grip strength | Insomnia | rs143384 | A | G | A | G | 0.0526 | -0.0135968 |
| Low grip strength | Insomnia | rs143830641 | A | G | A | G | -0.145 | -0.0013566 |
| Low grip strength | Insomnia | rs145217190 | A | G | A | G | 0.1292 | -0.0381828 |
| Low grip strength | Insomnia | rs145335930 | A | G | A | G | -0.0844 | 0.0598126 |
| Low grip strength | Insomnia | rs146536147 | T | C | T | C | -0.2394 | -0.116276 |
| Low grip strength | Insomnia | rs146993563 | T | C | T | C | 0.0956 | -0.0208201 |
| Low grip strength | Insomnia | rs147186444 | A | C | A | C | -0.1153 | -0.00218677 |
| Low grip strength | Insomnia | rs1474667 | A | G | A | G | 0.0487 | 0.0350156 |
| Low grip strength | Insomnia | rs147505997 | T | C | T | C | -0.5206 | -0.135626 |
| Low grip strength | Insomnia | rs148257233 | T | C | T | C | 0.1241 | 0.0295581 |
| Low grip strength | Insomnia | rs148868508 | T | G | T | G | -0.1719 | -0.0232677 |
| Low grip strength | Insomnia | rs149974870 | T | C | T | C | 0.1875 | 0.0680226 |
| Low grip strength | Insomnia | rs149998018 | C | G | C | G | 0.1349 | -0.100409 |
| Low grip strength | Insomnia | rs150276717 | A | G | A | G | 0.1716 | -0.292274 |
| Low grip strength | Insomnia | rs150341689 | T | G | T | G | 0.1582 | -0.189073 |
| Low grip strength | Insomnia | rs150506215 | A | G | A | G | 0.1991 | 0.0744154 |
| Low grip strength | Insomnia | rs150616816 | A | G | A | G | 0.2057 | 0.0475611 |
| Low grip strength | Insomnia | rs150931907 | T | C | T | C | 0.1841 | -0.00305077 |
| Low grip strength | Insomnia | rs151124871 | T | C | T | C | -0.1642 | 0.0247106 |
| Low grip strength | Insomnia | rs17068241 | T | C | T | C | -0.0979 | -0.016384 |
| Low grip strength | Insomnia | rs17101457 | T | G | T | G | -0.0587 | -0.000616159 |
| Low grip strength | Insomnia | rs17184509 | A | G | A | G | 0.1448 | 0.173848 |
| Low grip strength | Insomnia | rs1818759 | A | C | A | C | -0.1229 | -0.0627145 |
| Low grip strength | Insomnia | rs191252760 | A | G | A | G | -0.1863 | 0.0756385 |
| Low grip strength | Insomnia | rs191770260 | A | G | A | G | -0.1876 | 0.0213036 |
| Low grip strength | Insomnia | rs1989803 | C | G | C | G | -0.0595 | 0.0299343 |
| Low grip strength | Insomnia | rs2000924 | T | C | T | C | -0.0613 | -0.0427553 |
| Low grip strength | Insomnia | rs2039942 | A | T | A | T | -0.0547 | -0.031032 |
| Low grip strength | Insomnia | rs2132826 | A | G | A | G | -0.0668 | -0.0216329 |
| Low grip strength | Insomnia | rs2165819 | A | G | A | G | -0.0488 | -0.00855883 |
| Low grip strength | Insomnia | rs216616 | A | G | A | G | 0.0496 | 0.00238211 |
| Low grip strength | Insomnia | rs2230924 | T | C | T | C | 0.0518 | 0.0226359 |
| Low grip strength | Insomnia | rs2265309 | T | C | T | C | -0.0457 | -0.00852883 |
| Low grip strength | Insomnia | rs2403432 | T | C | T | C | 0.0457 | -0.022752 |
| Low grip strength | Insomnia | rs252609 | A | G | A | G | -0.0504 | -0.0394567 |
| Low grip strength | Insomnia | rs262817 | T | C | T | C | -0.044 | 0.00162042 |
| Low grip strength | Insomnia | rs2703595 | A | G | A | G | 0.0544 | -0.0300357 |
| Low grip strength | Insomnia | rs28045 | A | G | A | G | -0.0486 | 0.0238853 |
| Low grip strength | Insomnia | rs286969 | A | G | A | G | 0.0473 | 0.0339767 |
| Low grip strength | Insomnia | rs325077 | T | C | T | C | 0.0443 | -0.0416543 |
| Low grip strength | Insomnia | rs34000781 | T | C | T | C | 0.1904 | -0.474462 |
| Low grip strength | Insomnia | rs34049544 | A | G | A | G | -0.0499 | -0.00846416 |
| Low grip strength | Insomnia | rs34347509 | A | G | A | G | -0.1641 | -0.0272872 |
| Low grip strength | Insomnia | rs34464763 | A | T | A | T | 0.0591 | 0.0311621 |
| Low grip strength | Insomnia | rs34601425 | A | G | A | G | 0.0612 | 0.0308412 |
| Low grip strength | Insomnia | rs35146088 | T | G | T | G | 0.1388 | -0.139308 |
| Low grip strength | Insomnia | rs36164224 | A | G | A | G | -0.0505 | -0.0273689 |
| Low grip strength | Insomnia | rs3771501 | A | G | A | G | 0.0697 | -0.0139339 |
| Low grip strength | Insomnia | rs4077155 | T | C | T | C | 0.0548 | 0.0171916 |
| Low grip strength | Insomnia | rs4234203 | A | G | A | G | -0.0608 | -0.0588201 |
| Low grip strength | Insomnia | rs4572353 | T | C | T | C | -0.0434 | -0.0477653 |
| Low grip strength | Insomnia | rs4610825 | T | C | T | C | -0.0537 | 0.0572166 |
| Low grip strength | Insomnia | rs4646571 | T | C | T | C | -0.0566 | -0.0350827 |
| Low grip strength | Insomnia | rs4784329 | A | C | A | C | -0.0487 | 0.0516434 |
| Low grip strength | Insomnia | rs4808078 | T | C | T | C | -0.0536 | 0.0534773 |
| Low grip strength | Insomnia | rs4977302 | A | G | A | G | 0.1292 | -0.11788 |
| Low grip strength | Insomnia | rs552086 | C | G | C | G | -0.0626 | -0.00334002 |
| Low grip strength | Insomnia | rs55825215 | A | T | A | T | -0.0564 | 0.0152494 |
| Low grip strength | Insomnia | rs55993248 | A | G | A | G | 0.0603 | 0.0248675 |
| Low grip strength | Insomnia | rs57302030 | T | C | T | C | 0.0721 | -0.0410906 |
| Low grip strength | Insomnia | rs57473053 | T | C | T | C | -0.0859 | -0.00319791 |
| Low grip strength | Insomnia | rs6012326 | A | G | A | G | 0.0529 | -0.00793664 |
| Low grip strength | Insomnia | rs60685799 | A | G | A | G | 0.0635 | 0.0370678 |
| Low grip strength | Insomnia | rs60946803 | T | C | T | C | -0.1783 | 0.0376162 |
| Low grip strength | Insomnia | rs61788386 | A | T | A | T | 0.0822 | 0.0590807 |
| Low grip strength | Insomnia | rs62404986 | T | C | T | C | -0.1017 | 0.0143641 |
| Low grip strength | Insomnia | rs6713703 | A | G | A | G | 0.0545 | 0.00729068 |
| Low grip strength | Insomnia | rs6768860 | A | G | A | G | 0.0481 | 0.00321212 |
| Low grip strength | Insomnia | rs6776490 | A | G | A | G | 0.1012 | 0.0145235 |
| Low grip strength | Insomnia | rs6832859 | C | G | C | G | 0.2023 | -0.0870705 |
| Low grip strength | Insomnia | rs6910879 | A | G | A | G | -0.1245 | -0.207458 |
| Low grip strength | Insomnia | rs6961756 | C | G | C | G | -0.0533 | 0.0178374 |
| Low grip strength | Insomnia | rs7034200 | A | C | A | C | -0.049 | 0.0140835 |
| Low grip strength | Insomnia | rs71508831 | A | G | A | G | 0.1436 | 0.0500845 |
| Low grip strength | Insomnia | rs72633754 | A | G | A | G | -0.076 | -0.0723218 |
| Low grip strength | Insomnia | rs72777366 | T | C | T | C | -0.077 | 0.00475108 |
| Low grip strength | Insomnia | rs72777762 | C | G | C | G | -0.0733 | -0.0547708 |
| Low grip strength | Insomnia | rs72806740 | A | G | A | G | 0.0836 | -0.0271361 |
| Low grip strength | Insomnia | rs72821916 | A | G | A | G | -0.1236 | -0.0986358 |
| Low grip strength | Insomnia | rs72918905 | A | G | A | G | -0.1578 | 0.280472 |
| Low grip strength | Insomnia | rs7306606 | T | C | T | C | -0.0515 | -0.012848 |
| Low grip strength | Insomnia | rs7334602 | T | C | T | C | 0.1573 | 0.0692211 |
| Low grip strength | Insomnia | rs741804 | A | C | A | C | -0.1114 | -0.0439291 |
| Low grip strength | Insomnia | rs74643782 | A | T | A | T | -0.1813 | -0.0669174 |
| Low grip strength | Insomnia | rs7505321 | T | C | T | C | 0.0802 | -0.058551 |
| Low grip strength | Insomnia | rs7536094 | A | C | A | C | -0.0753 | -0.0366121 |
| Low grip strength | Insomnia | rs7592340 | T | C | T | C | -0.0639 | -0.0353089 |
| Low grip strength | Insomnia | rs7593100 | T | C | T | C | -0.082 | -0.136886 |
| Low grip strength | Insomnia | rs7622008 | T | C | T | C | 0.0436 | -0.032571 |
| Low grip strength | Insomnia | rs7623333 | A | G | A | G | 0.0474 | 0.0111468 |
| Low grip strength | Insomnia | rs76257146 | A | C | A | C | -0.1736 | -0.0156834 |
| Low grip strength | Insomnia | rs7626596 | A | G | A | G | 0.0435 | -0.0298691 |
| Low grip strength | Insomnia | rs7732836 | T | C | T | C | 0.0537 | -0.0209112 |
| Low grip strength | Insomnia | rs7745206 | T | C | T | C | -0.0609 | -0.0140702 |
| Low grip strength | Insomnia | rs7760841 | T | C | T | C | 0.1229 | -0.0351599 |
| Low grip strength | Insomnia | rs78464458 | T | C | T | C | 0.1845 | -0.162172 |
| Low grip strength | Insomnia | rs7873013 | T | G | T | G | 0.0489 | 0.0287223 |
| Low grip strength | Insomnia | rs7900201 | T | C | T | C | -0.0465 | -0.00357007 |
| Low grip strength | Insomnia | rs79379401 | A | G | A | G | 0.131 | -0.0121194 |
| Low grip strength | Insomnia | rs7948251 | T | C | T | C | 0.0539 | -0.0157613 |
| Low grip strength | Insomnia | rs7951177 | A | G | A | G | 0.1594 | -0.149927 |
| Low grip strength | Insomnia | rs797008 | A | T | A | T | 0.0911 | 0.0192733 |
| Low grip strength | Insomnia | rs79723785 | T | C | T | C | -0.184 | 0.192924 |
| Low grip strength | Insomnia | rs815891 | T | C | T | C | 0.0485 | 0.0193004 |
| Low grip strength | Insomnia | rs854743 | A | G | A | G | -0.0459 | -0.0342827 |
| Low grip strength | Insomnia | rs9455684 | T | C | T | C | 0.1444 | 0.0410055 |
| Low grip strength | Insomnia | rs9514996 | T | C | T | C | -0.0528 | 0.0609672 |
| Low grip strength | Insomnia | rs9573278 | T | C | T | C | -0.0688 | -0.0428973 |
| Low grip strength | Insomnia | rs9807708 | T | C | T | C | -0.0511 | -0.0439246 |
| Low grip strength | Insomnia | rs9819200 | T | C | T | C | 0.067 | -0.0252524 |
| Low grip strength | Insomnia | rs9937642 | T | C | T | C | -0.0558 | 0.035943 |
| Low grip strength | Sleep-wake | rs10070428 | T | G | T | G | 0.046 | 0.0278112 |
| Low grip strength | Sleep-wake | rs10474113 | A | G | A | G | -0.0546 | 0.0615066 |
| Low grip strength | Sleep-wake | rs10892358 | A | G | A | G | 0.0467 | 0.0810937 |
| Low grip strength | Sleep-wake | rs11057696 | T | C | T | C | -0.0523 | 0.0828287 |
| Low grip strength | Sleep-wake | rs11088193 | T | G | T | G | -0.0451 | -0.0573118 |
| Low grip strength | Sleep-wake | rs1110395 | A | G | A | G | 0.1521 | -0.404096 |
| Low grip strength | Sleep-wake | rs111576064 | T | C | T | C | 0.0997 | 0.226586 |
| Low grip strength | Sleep-wake | rs113300414 | A | G | A | G | 0.165 | -0.798891 |
| Low grip strength | Sleep-wake | rs113853893 | A | T | A | T | -0.1237 | 0.0625234 |
| Low grip strength | Sleep-wake | rs114133398 | A | G | A | G | -0.087 | -0.0622904 |
| Low grip strength | Sleep-wake | rs11568828 | T | C | T | C | -0.0898 | -0.0185725 |
| Low grip strength | Sleep-wake | rs115783351 | A | G | A | G | 0.1632 | -0.134062 |
| Low grip strength | Sleep-wake | rs11598109 | T | G | T | G | 0.132 | -0.194287 |
| Low grip strength | Sleep-wake | rs11626651 | T | C | T | C | -0.0494 | -0.0253764 |
| Low grip strength | Sleep-wake | rs116807160 | A | G | A | G | 0.1724 | -0.0319161 |
| Low grip strength | Sleep-wake | rs116975610 | A | G | A | G | 0.1806 | 0.0899583 |
| Low grip strength | Sleep-wake | rs118146673 | T | G | T | G | 0.1055 | -0.0758272 |
| Low grip strength | Sleep-wake | rs11926577 | A | G | A | G | 0.0872 | 0.156416 |
| Low grip strength | Sleep-wake | rs12030926 | A | G | A | G | 0.0452 | -0.0984018 |
| Low grip strength | Sleep-wake | rs12293240 | A | T | A | T | 0.0717 | 0.111233 |
| Low grip strength | Sleep-wake | rs12531053 | A | C | A | C | -0.0507 | -0.0356259 |
| Low grip strength | Sleep-wake | rs12578008 | T | C | T | C | -0.0915 | 0.0756249 |
| Low grip strength | Sleep-wake | rs12682350 | C | G | C | G | 0.0553 | 0.0531497 |
| Low grip strength | Sleep-wake | rs13403900 | A | T | A | T | -0.1037 | 0.112464 |
| Low grip strength | Sleep-wake | rs134972 | A | G | A | G | -0.0699 | -0.12473 |
| Low grip strength | Sleep-wake | rs138435721 | T | C | T | C | -0.1473 | -0.0795033 |
| Low grip strength | Sleep-wake | rs139635068 | T | C | T | C | -0.1763 | 0.420877 |
| Low grip strength | Sleep-wake | rs140309421 | A | G | A | G | 0.1596 | -0.0106596 |
| Low grip strength | Sleep-wake | rs140471740 | T | C | T | C | 0.1605 | -0.110944 |
| Low grip strength | Sleep-wake | rs141629814 | A | C | A | C | 0.2021 | 0.226158 |
| Low grip strength | Sleep-wake | rs141779071 | A | G | A | G | 0.144 | -0.303032 |
| Low grip strength | Sleep-wake | rs142003516 | A | G | A | G | 0.2246 | -0.132799 |
| Low grip strength | Sleep-wake | rs142340414 | T | C | T | C | -0.2313 | 0.211547 |
| Low grip strength | Sleep-wake | rs142457829 | A | G | A | G | -0.2056 | -3.02446 |
| Low grip strength | Sleep-wake | rs143830641 | A | G | A | G | -0.145 | 0.332726 |
| Low grip strength | Sleep-wake | rs145217190 | A | G | A | G | 0.1292 | -0.388091 |
| Low grip strength | Sleep-wake | rs145335930 | A | G | A | G | -0.0844 | -0.0424507 |
| Low grip strength | Sleep-wake | rs146993563 | T | C | T | C | 0.0956 | 0.1878 |
| Low grip strength | Sleep-wake | rs147186444 | A | C | A | C | -0.1153 | 0.353407 |
| Low grip strength | Sleep-wake | rs147505997 | T | C | T | C | -0.5206 | 0.0927859 |
| Low grip strength | Sleep-wake | rs148868508 | T | G | T | G | -0.1719 | 0.0388377 |
| Low grip strength | Sleep-wake | rs149974870 | T | C | T | C | 0.1875 | 0.131192 |
| Low grip strength | Sleep-wake | rs149998018 | C | G | C | G | 0.1349 | -0.38398 |
| Low grip strength | Sleep-wake | rs150276717 | A | G | A | G | 0.1716 | -0.492811 |
| Low grip strength | Sleep-wake | rs150341689 | T | G | T | G | 0.1582 | -0.136732 |
| Low grip strength | Sleep-wake | rs150506215 | A | G | A | G | 0.1991 | -0.446282 |
| Low grip strength | Sleep-wake | rs150616816 | A | G | A | G | 0.2057 | 0.735862 |
| Low grip strength | Sleep-wake | rs150931907 | T | C | T | C | 0.1841 | -0.00616214 |
| Low grip strength | Sleep-wake | rs151124871 | T | C | T | C | -0.1642 | -0.432199 |
| Low grip strength | Sleep-wake | rs17068241 | T | C | T | C | -0.0979 | -0.0147963 |
| Low grip strength | Sleep-wake | rs17101457 | T | G | T | G | -0.0587 | 0.116939 |
| Low grip strength | Sleep-wake | rs17184509 | A | G | A | G | 0.1448 | 0.430909 |
| Low grip strength | Sleep-wake | rs1818759 | A | C | A | C | -0.1229 | -0.260206 |
| Low grip strength | Sleep-wake | rs191252760 | A | G | A | G | -0.1863 | 0.534642 |
| Low grip strength | Sleep-wake | rs191770260 | A | G | A | G | -0.1876 | -0.247941 |
| Low grip strength | Sleep-wake | rs1989803 | C | G | C | G | -0.0595 | 0.0900962 |
| Low grip strength | Sleep-wake | rs2039942 | A | T | A | T | -0.0547 | 0.0705558 |
| Low grip strength | Sleep-wake | rs2132826 | A | G | A | G | -0.0668 | -0.0331385 |
| Low grip strength | Sleep-wake | rs2165819 | A | G | A | G | -0.0488 | -0.00403992 |
| Low grip strength | Sleep-wake | rs216616 | A | G | A | G | 0.0496 | -0.15911 |
| Low grip strength | Sleep-wake | rs2230924 | T | C | T | C | 0.0518 | -0.0161715 |
| Low grip strength | Sleep-wake | rs2403432 | T | C | T | C | 0.0457 | 0.0145007 |
| Low grip strength | Sleep-wake | rs252609 | A | G | A | G | -0.0504 | -0.0282707 |
| Low grip strength | Sleep-wake | rs262817 | T | C | T | C | -0.044 | 0.161052 |
| Low grip strength | Sleep-wake | rs28045 | A | G | A | G | -0.0486 | 0.0818904 |
| Low grip strength | Sleep-wake | rs34000781 | T | C | T | C | 0.1904 | 1.61239 |
| Low grip strength | Sleep-wake | rs34049544 | A | G | A | G | -0.0499 | 0.0133369 |
| Low grip strength | Sleep-wake | rs34347509 | A | G | A | G | -0.1641 | 0.427056 |
| Low grip strength | Sleep-wake | rs34464763 | A | T | A | T | 0.0591 | 0.0331758 |
| Low grip strength | Sleep-wake | rs35146088 | T | G | T | G | 0.1388 | -0.366074 |
| Low grip strength | Sleep-wake | rs36164224 | A | G | A | G | -0.0505 | -0.0548686 |
| Low grip strength | Sleep-wake | rs4234203 | A | G | A | G | -0.0608 | -0.0902151 |
| Low grip strength | Sleep-wake | rs4572353 | T | C | T | C | -0.0434 | -0.0672706 |
| Low grip strength | Sleep-wake | rs4610825 | T | C | T | C | -0.0537 | -0.00364871 |
| Low grip strength | Sleep-wake | rs4808078 | T | C | T | C | -0.0536 | 0.0224278 |
| Low grip strength | Sleep-wake | rs4977302 | A | G | A | G | 0.1292 | -0.128013 |
| Low grip strength | Sleep-wake | rs552086 | C | G | C | G | -0.0626 | -0.00775699 |
| Low grip strength | Sleep-wake | rs55825215 | A | T | A | T | -0.0564 | -0.0646392 |
| Low grip strength | Sleep-wake | rs57302030 | T | C | T | C | 0.0721 | -0.0269792 |
| Low grip strength | Sleep-wake | rs57473053 | T | C | T | C | -0.0859 | -0.0647278 |
| Low grip strength | Sleep-wake | rs6012326 | A | G | A | G | 0.0529 | 0.0363604 |
| Low grip strength | Sleep-wake | rs60685799 | A | G | A | G | 0.0635 | 0.00443739 |
| Low grip strength | Sleep-wake | rs60946803 | T | C | T | C | -0.1783 | 0.0263698 |
| Low grip strength | Sleep-wake | rs61788386 | A | T | A | T | 0.0822 | 0.107158 |
| Low grip strength | Sleep-wake | rs62404986 | T | C | T | C | -0.1017 | -0.032059 |
| Low grip strength | Sleep-wake | rs6713703 | A | G | A | G | 0.0545 | 0.0247788 |
| Low grip strength | Sleep-wake | rs6768860 | A | G | A | G | 0.0481 | 0.0309043 |
| Low grip strength | Sleep-wake | rs6776490 | A | G | A | G | 0.1012 | -0.208544 |
| Low grip strength | Sleep-wake | rs6832859 | C | G | C | G | 0.2023 | 0.348188 |
| Low grip strength | Sleep-wake | rs6961756 | C | G | C | G | -0.0533 | 0.121739 |
| Low grip strength | Sleep-wake | rs71508831 | A | G | A | G | 0.1436 | -0.0438496 |
| Low grip strength | Sleep-wake | rs72633754 | A | G | A | G | -0.076 | -0.195749 |
| Low grip strength | Sleep-wake | rs72777366 | T | C | T | C | -0.077 | -0.000401926 |
| Low grip strength | Sleep-wake | rs72777762 | C | G | C | G | -0.0733 | -0.0328609 |
| Low grip strength | Sleep-wake | rs72806740 | A | G | A | G | 0.0836 | -0.137321 |
| Low grip strength | Sleep-wake | rs72821916 | A | G | A | G | -0.1236 | -0.22998 |
| Low grip strength | Sleep-wake | rs72918905 | A | G | A | G | -0.1578 | 0.352912 |
| Low grip strength | Sleep-wake | rs7334602 | T | C | T | C | 0.1573 | 0.211352 |
| Low grip strength | Sleep-wake | rs741804 | A | C | A | C | -0.1114 | -0.104003 |
| Low grip strength | Sleep-wake | rs74643782 | A | T | A | T | -0.1813 | 0.00591155 |
| Low grip strength | Sleep-wake | rs7505321 | T | C | T | C | 0.0802 | -0.145676 |
| Low grip strength | Sleep-wake | rs7536094 | A | C | A | C | -0.0753 | 0.0216107 |
| Low grip strength | Sleep-wake | rs7592340 | T | C | T | C | -0.0639 | -0.00598846 |
| Low grip strength | Sleep-wake | rs7593100 | T | C | T | C | -0.082 | -0.207685 |
| Low grip strength | Sleep-wake | rs7622008 | T | C | T | C | 0.0436 | 0.00454455 |
| Low grip strength | Sleep-wake | rs7623333 | A | G | A | G | 0.0474 | 0.08686 |
| Low grip strength | Sleep-wake | rs76257146 | A | C | A | C | -0.1736 | 0.226133 |
| Low grip strength | Sleep-wake | rs7732836 | T | C | T | C | 0.0537 | 0.0405208 |
| Low grip strength | Sleep-wake | rs78464458 | T | C | T | C | 0.1845 | -0.0578445 |
| Low grip strength | Sleep-wake | rs7848453 | A | G | A | G | -0.2592 | -0.104249 |
| Low grip strength | Sleep-wake | rs7873013 | T | G | T | G | 0.0489 | -0.00998916 |
| Low grip strength | Sleep-wake | rs7900201 | T | C | T | C | -0.0465 | 0.0589858 |
| Low grip strength | Sleep-wake | rs79379401 | A | G | A | G | 0.131 | -0.0365919 |
| Low grip strength | Sleep-wake | rs7948251 | T | C | T | C | 0.0539 | 0.0101186 |
| Low grip strength | Sleep-wake | rs7951177 | A | G | A | G | 0.1594 | 0.300224 |
| Low grip strength | Sleep-wake | rs797008 | A | T | A | T | 0.0911 | 0.186329 |
| Low grip strength | Sleep-wake | rs815891 | T | C | T | C | 0.0485 | 0.000924074 |
| Low grip strength | Sleep-wake | rs854743 | A | G | A | G | -0.0459 | -0.030369 |
| Low grip strength | Sleep-wake | rs9455684 | T | C | T | C | 0.1444 | -0.25644 |
| Low grip strength | Sleep-wake | rs9573278 | T | C | T | C | -0.0688 | 0.00229038 |
| Low grip strength | Sleep-wake | rs9807708 | T | C | T | C | -0.0511 | -0.00778453 |
| Low grip strength | Sleep-wake | rs9937642 | T | C | T | C | -0.0558 | -0.0225518 |
| Low grip strength | Daytime napping | rs185320691 | C | G | C | G | 0.1458 | 0.000231969 |
| Low grip strength | Daytime napping | rs191252760 | G | A | G | A | 0.1863 | 0.00401466 |
| Low grip strength | Daytime napping | rs35021449 | T | C | T | C | 0.1253 | 0.00253549 |
| Low grip strength | Daytime napping | rs552086 | C | G | C | G | -0.0626 | -0.000438904 |
| Low grip strength | Daytime napping | rs6910879 | G | A | G | A | 0.1245 | 0.0047663 |
| Low grip strength | Daytime napping | rs7760841 | T | C | T | C | 0.1229 | 0.00250301 |
| Low grip strength | Chronotype | rs12030926 | A | G | A | G | 0.0452 | -0.00258221 |
| Low grip strength | Chronotype | rs142003516 | A | G | A | G | 0.2246 | 0.0155183 |
| Low grip strength | Chronotype | rs79348100 | A | G | A | G | 0.1154 | 0.0185887 |
